# Supplementary material
Source: Royal Society of Chemistry journal article supplement (doi:10.1039/d5cp04727g)
Supplement: d5cp04727g1.pdf [file d5cp04727g1.pdf]

## Supporting Information

### Photoinduced Electron Transfer (PET) in Ethaline-like solvents

Saqib Rabbani, Mohammedulameen Fakhri, Andy Lin, Sasha Noble, John R. Swierk

Department of Chemistry, Binghamton University, Binghamton, New York 13902, United States

---

#### Supporting information

##### Table of Contents

|                                                                                                  |    |
|--------------------------------------------------------------------------------------------------|----|
| 1. Synthesis of Quenchers .....                                                                  | 2  |
| 2. Grunberg-Nissan Model .....                                                                   | 6  |
| 3. Photophysical characterization data for $[\text{Ru}(\text{bpy})_3]^{2+}$ .....                | 7  |
| 4. Electrochemical characterization data for $[\text{Ru}(\text{bpy})_3]^{2+}$ and quenchers..... | 11 |
| 5. Electron Transfer Data .....                                                                  | 22 |

## 1. Synthesis of quenchers

### 1.1 Synthesis of 2,11-Dimethyl-6,7-dihydrodipyrido[1,2-a:2',1'-c]pyrazinedium dibromide (DMPP-DB)

A solution of 1.656 g (9 mmol, 1 e.q.) of 4,4'-dimethyl-2,2'-bipyridine in 45 mL (522 mmol, 58 e.q.) of 1,2-dibromoethane was refluxed for 40 h at 125 °C, during which time a precipitate was formed. The mixture was cooled and filtered, and the precipitate was washed with acetone and chloroform to afford 2.489 g (74% yield) of a white-pinkish crystalline solid identified as 12A: NMR (D<sub>2</sub>O at 4.7): 2.78 (s, 6 H), 5.19 (s, 4 H), 8.13 (d, 2 H, J = 6 Hz), 8.75 (s, 2 H), 8.93 (d, 2 H, J = 6 Hz).

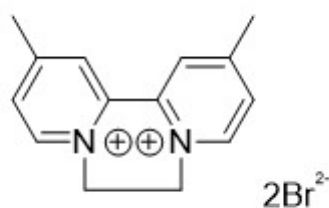

Figure S1A. chemical structure of salt DMPP-DB.

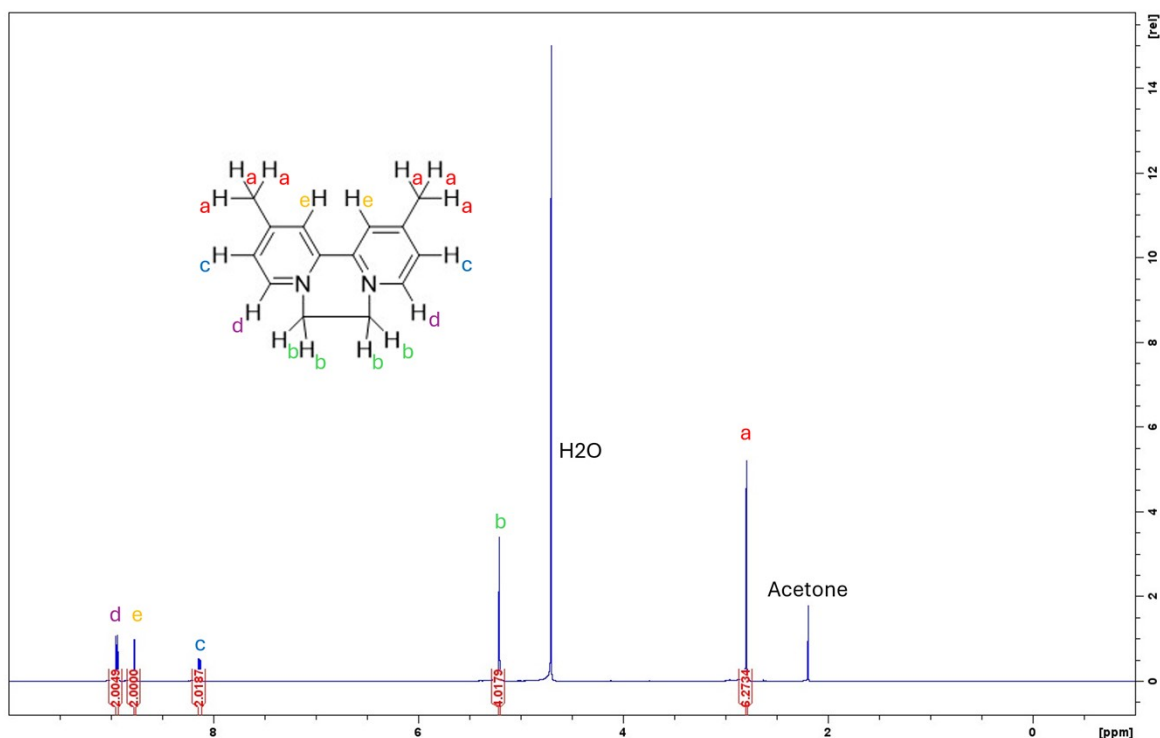

Figure S1B. <sup>1</sup>H-NMR spectrum of salt DMPP-DB.

## 1.2 Synthesis of 2,12- Dimethyl-7,8-dihydro-6Ff-dipyrido[1,2-a :2',1'-c ]-[1,4]diazepinium Dibromide (DMDHP-DB)

A solution of 1.105 g (6 mmol, 1 e.q.) of 4,4'-dimethyl-2,2'-bipyridine in 15 mL (150 mmol, 25 e.q.) of 1,3-Dibromopropane was refluxed for 40 h at 125 °C, during which time a precipitate was formed. The mixture was cooled and filtered, and the precipitate was washed with acetone and chloroform to afford 2.212 g (95% yield) of a white-pinkish crystalline solid identified as 12A: NMR (D<sub>2</sub>O at 4.7 ): 2.76 (s, 6 H), 2.83-2.93 (m, 2 H ), 4.37-4.49 (m, 2 H, ), 4.89-4.98 (dt, 2 H, J = 15 Hz), 8.15 (d, 2 H, J = 7 Hz), 8.28 (s, 2 H), 8.96 (d, 2 H, J = 6 Hz).

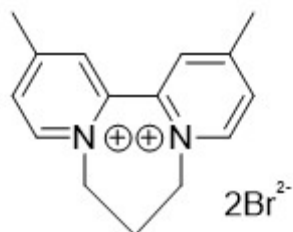

Figure S2A. Chemical structure of salt DMDHP-DB.

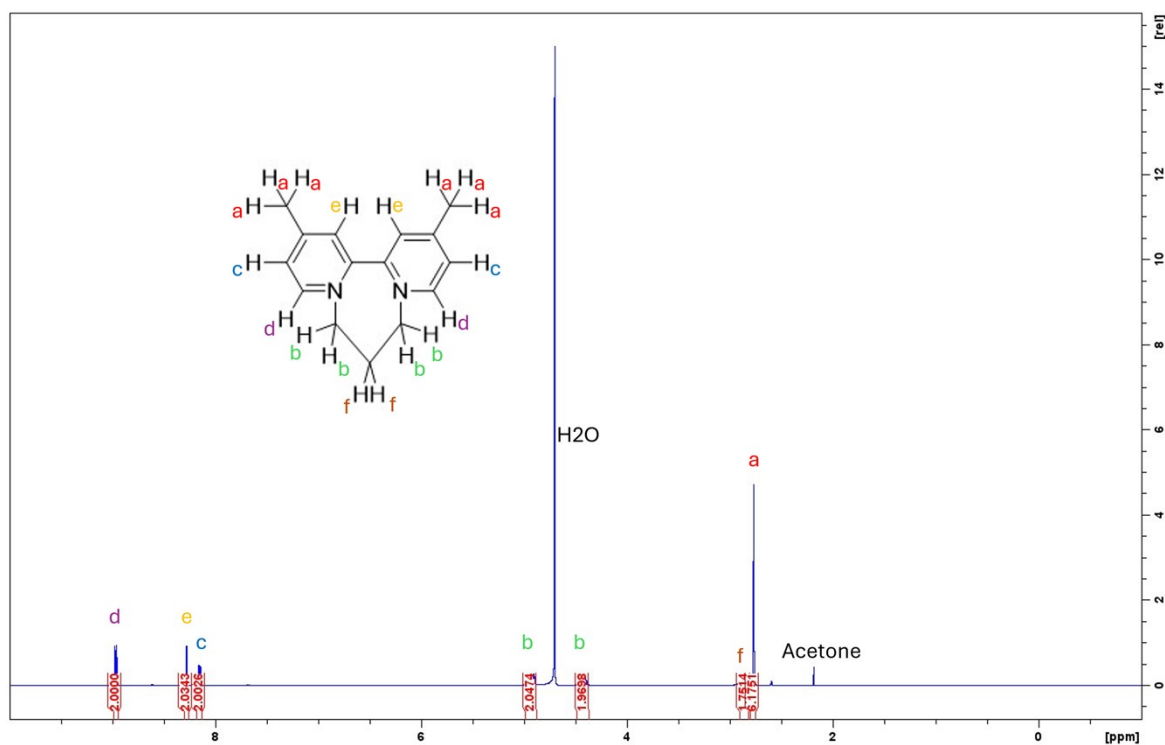

Figure S2B. <sup>1</sup>H-NMR spectrum of salt DMDHP-DB.

### 1.3 Synthesis of 6,7,8,9-tetrahydro-2,13-dimethyldipyrido<1,2-a:2',1'-c><1,4>diazocinediium dibromide (THDDP-DB)

A solution of 0.1842 g (1 mmol, 1 e.q.) of 4,4'-dimethyl-2,2'-bipyridine in 1.000 mL (9 mmol, 9 e.q.) of 1,4-Dibromobutane was refluxed for 27 h at 80 °C, during which time a precipitate was formed. The mixture was cooled and filtered, and the precipitate was washed with acetone and chloroform to afford 2.256 g (68% yield) of a white-pinkish crystalline solid identified as 12C: NMR (D<sub>2</sub>O at 4.7): 2.08-2.15 (m, 2 H), 2.37-2.45 (m, 2 H), 2.74 (s, 6 H), 4.04-4.15 (m, 2 H), 4.79 (dd, 2 H, J = 15 Hz), 8.14 (s, 2 H), 8.21 (d, 2 H, J = 6 Hz), 9.06 (d, 2 H, J = 6 Hz).

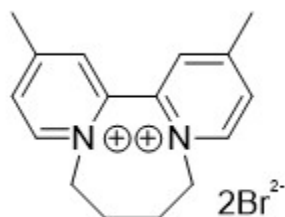

Figure S3A. Chemical structure of THDDP-DB.

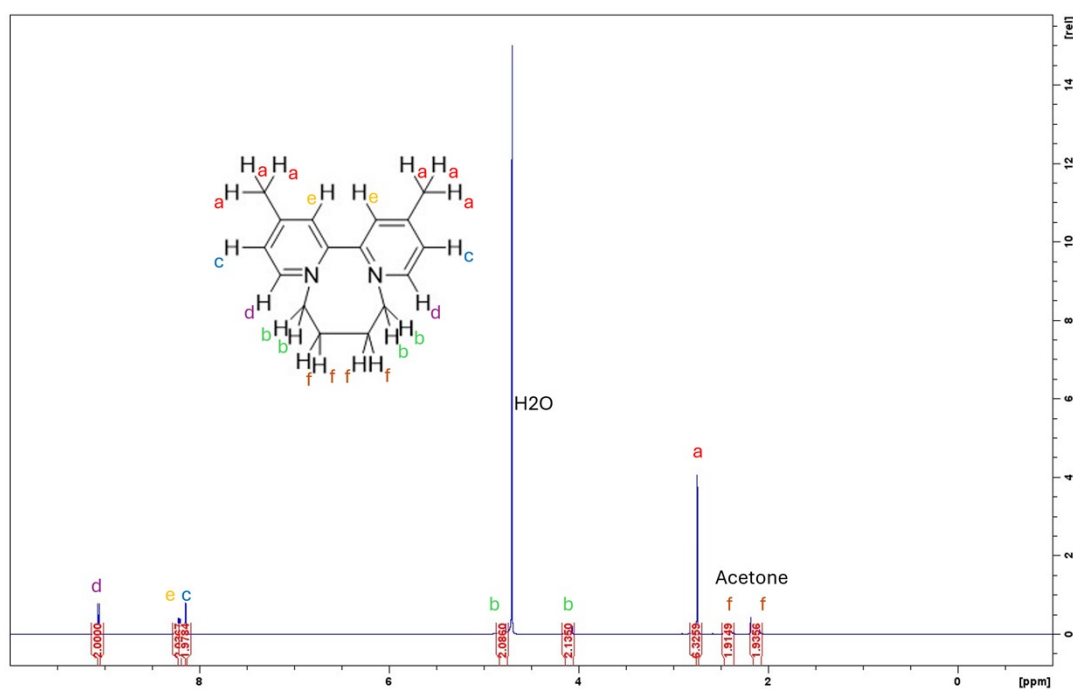

Figure S3B. <sup>1</sup>H-NMR spectrum of salt THDDP-DB.

#### 1.4 Synthesis of 1,1',4,4'-Tetramethyl-2,2'-bipyridinium diiodide (TMBP-I<sub>2</sub>)

A solution of 1.0133 g (5.5 mmol, 1 e.q.) of 4,4'-dimethyl-2,2'-bipyridine in 3.080 mL (49.5 mmol, 9 e.q.) of Iodomethane was refluxed for 18 h at 85 °C, in 12.5 mL of dry Acetonitrile, during which time a precipitate was formed. The mixture was cooled and filtered, and the precipitate was washed with acetone and Acetonitrile to afford 1.326 g (51% yield) of a yellowish crystalline solid identified as 12D: NMR (D<sub>2</sub>O at 4.7): 2.73 (s, 6 H), 4.10 (s, 6 H), 8.14-8.18 (m, 4 H,) 8.96 (d, 2 H, J = 6 Hz).

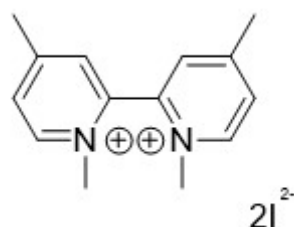

Figure S4A. Chemical structure of salt TMBP-I<sub>2</sub>.

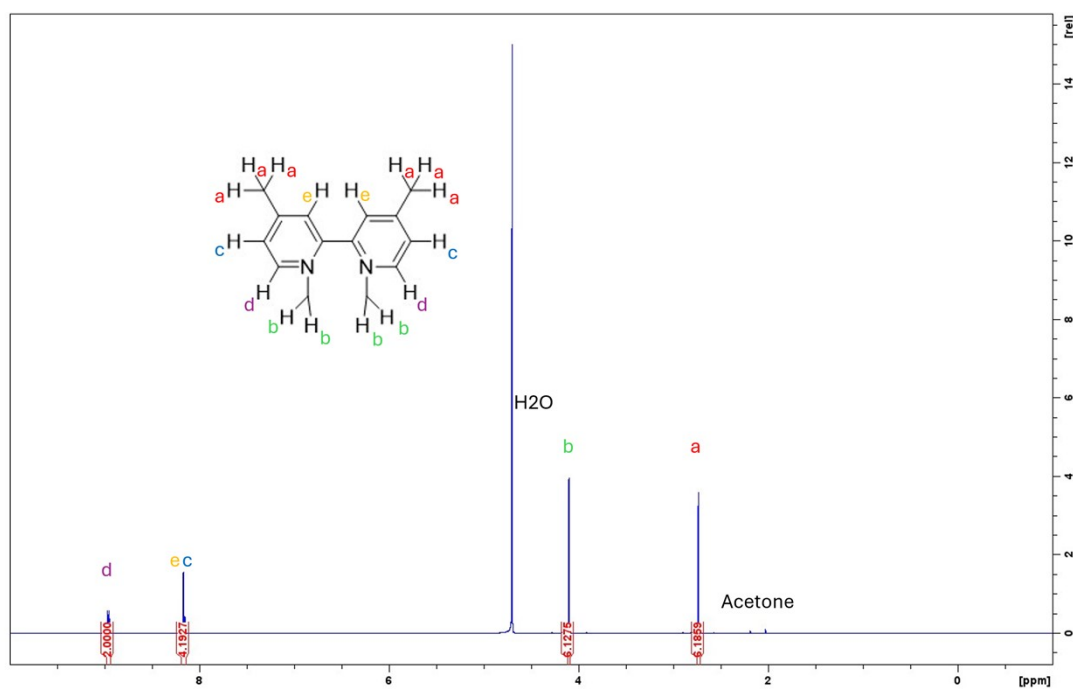

Fig. S4B. <sup>1</sup>H-NMR spectrum of salt TMBP-I<sub>2</sub>.

## 2. Grunberg-Nissan viscosity model

$$\ln(\eta_{mix}) = x_1 \ln(\eta_1) + x_2 \ln(\eta_2) + x_1 x_2 G_{12} \quad (S1)$$

Here  $x_1$  and  $x_2$  is mole fraction of ethaline, and water respectively,  $\eta_1$ ,  $\eta_2$ ,  $\eta_{mix}$  are viscosities of pure ethaline, water, and ethaline water mixtures, respectively.

**Table S1.** The experimental and predicted viscosities using Grunberg-Nissan viscosity model

| DES% | $\rho$<br>(g/mL) | $x_1$ of<br>ethaline | $x_1$ of<br>water | $\eta_{exp}$ (Pa s) | $\eta_{pred}$ (Pa<br>s) | Absolute error<br>(Pa s) | $G_{12}$ |
|------|------------------|----------------------|-------------------|---------------------|-------------------------|--------------------------|----------|
| 0    | 1.012            | 0                    | 1                 | 0.000991            | 0.000991                | 0                        | Undefine |
| 10   | 1.014            | 0.02                 | 0.98              | 0.001092            | 0.001189                | 0.000097                 | 0.564    |
| 30   | 1.038            | 0.09                 | 0.91              | 0.00188             | 0.001871                | 0.000009                 | 4.098    |
| 50   | 1.060            | 0.18                 | 0.82              | 0.00368             | 0.003472                | 0.000208                 | 4.447    |
| 70   | 1.074            | 0.35                 | 0.65              | 0.00853             | 0.008276                | 0.000254                 | 4.183    |
| 90   | 1.094            | 0.67                 | 0.33              | 0.0237              | 0.025248                | 0.001548                 | 3.769    |
| 100  | 1.1174           | 1                    | 0                 | 0.0326              | 0.0326                  | 0                        | Undefine |

### 3. Photophysical characterization data for $[\text{Ru}(\text{bpy})_3]^{2+}$

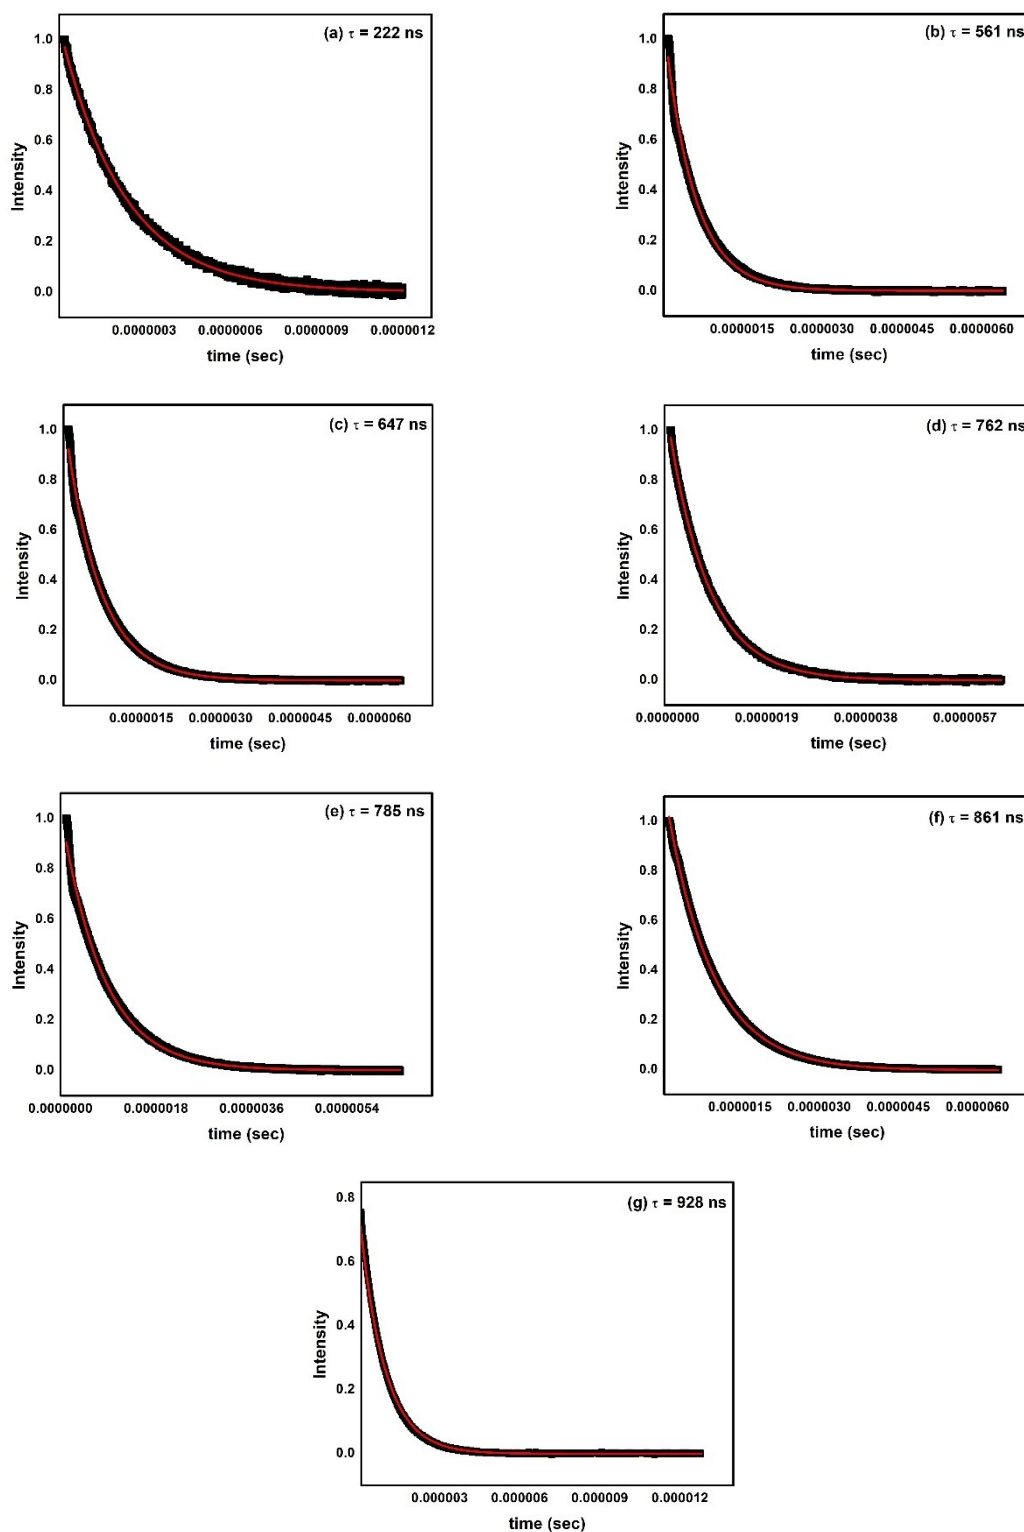

**Fig. S5.** Emission lifetime of tris(2,2'-bipyridine) ruthenium (II) hexafluorophosphate  $[\text{Ru}(\text{bpy})_3]^{2+}$  in (a) 0% DES mixture, (b) 10% DES mixture, (c) 30% DES mixture, (d) 50% DES mixture, (e) 70% DES mixture and (f) 90% DES mixture (g) 100% DES mixture.

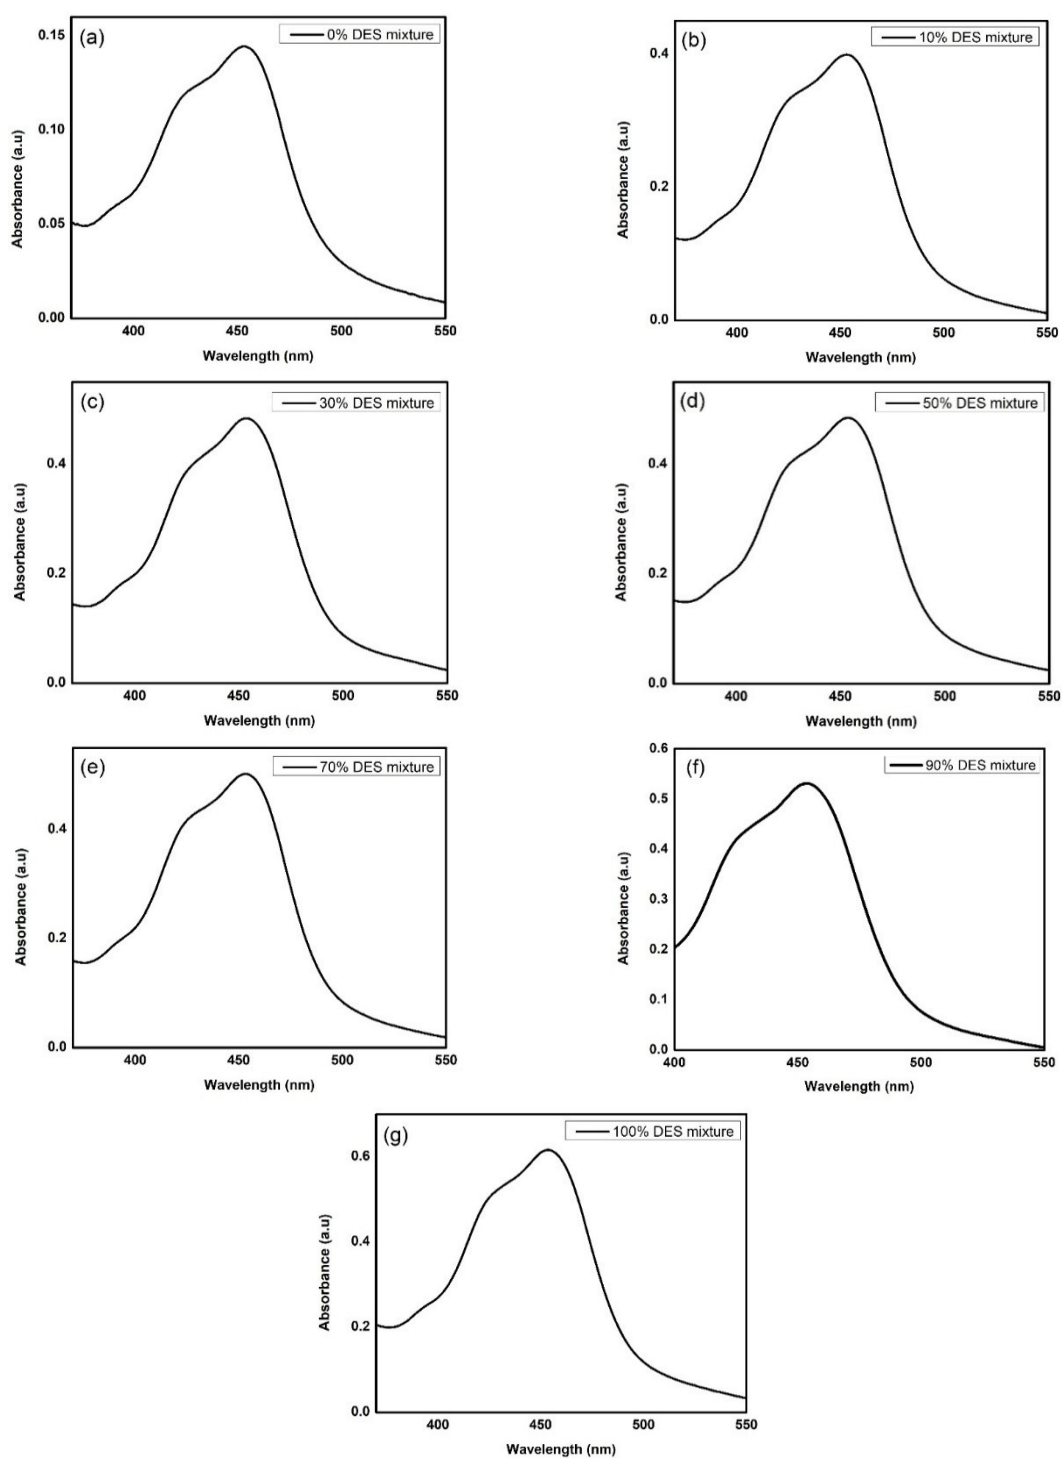

**Fig. S6.** UV-vis spectra of tris(2,2'-bipyridine) ruthenium (II) hexafluorophosphate  $[\text{Ru}(\text{bpy})_3]^{2+}$  in (a) 0% DES, (b) 10% DES mixture, (c) 30% DES mixture, (d) 50% DES mixture, (e) 70% DES mixture, (f) 90% DES mixture and (g) 100% DES mixture.

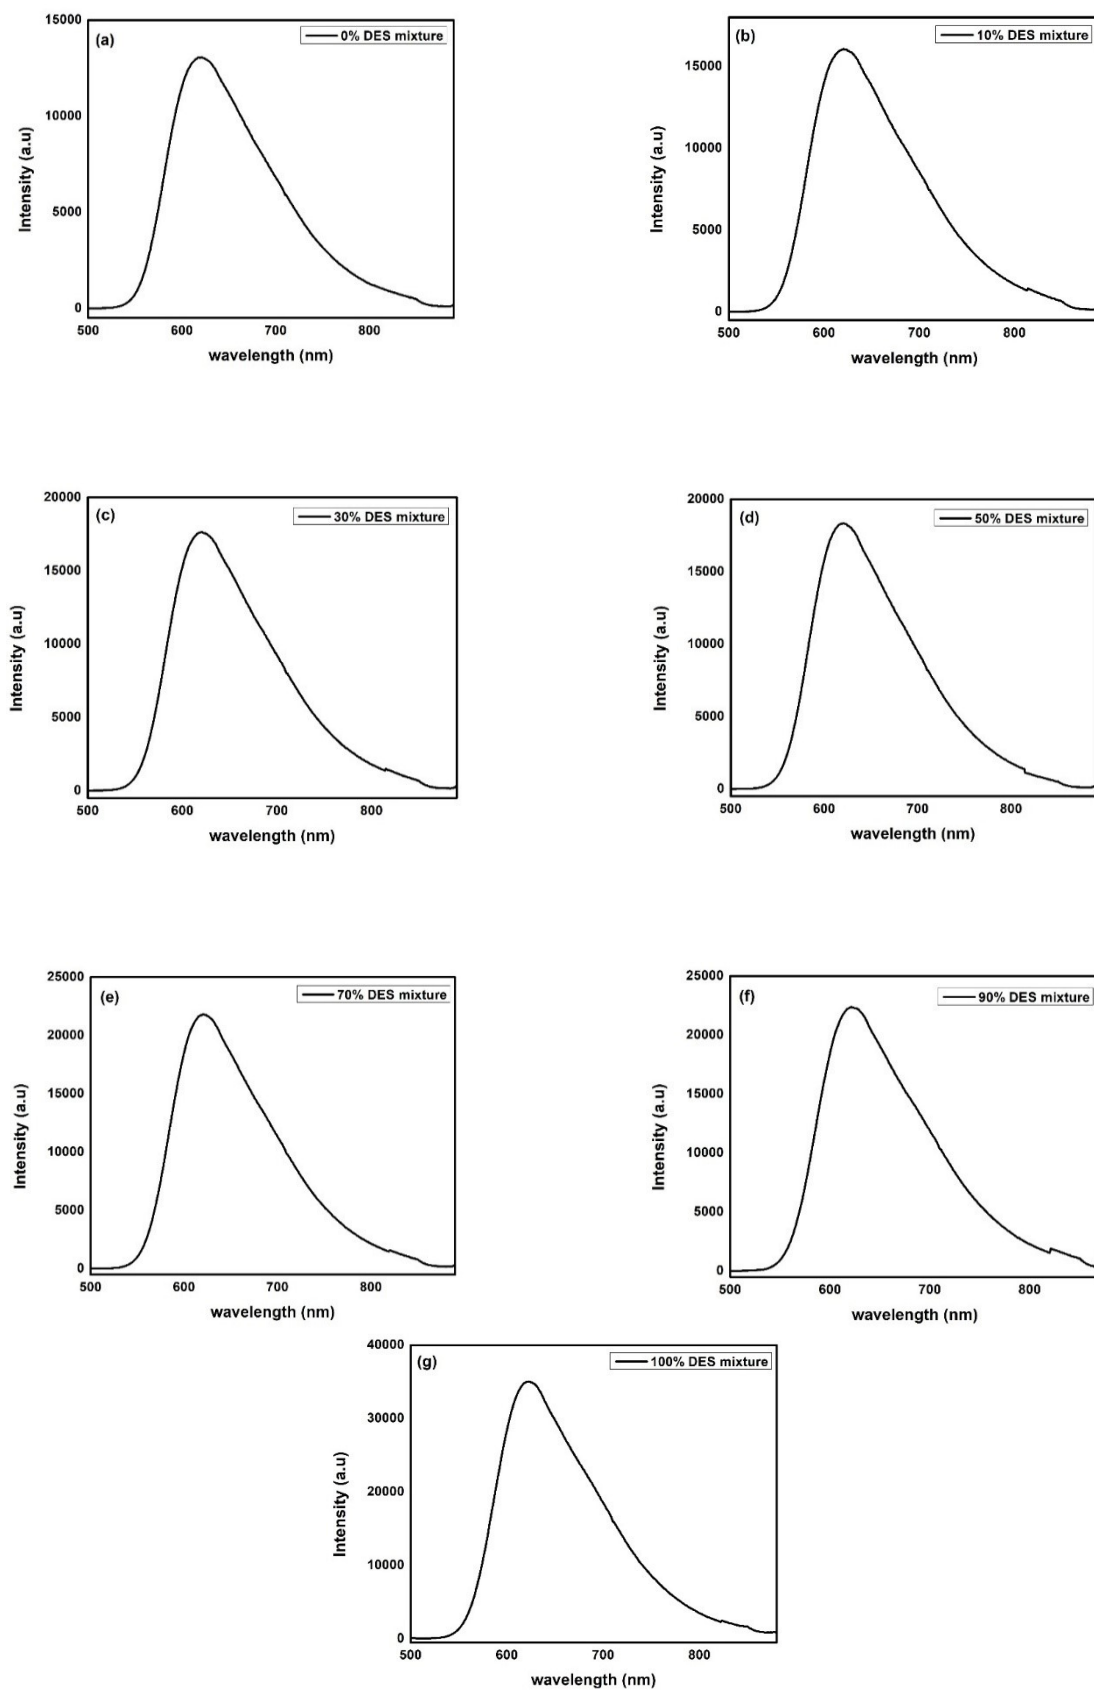

**Fig. S7.** Fluorescence emission spectra ( $\lambda_{\text{excitation}} = 453 \text{ nm}$ ) of tris(2,2'-bipyridine) ruthenium (II) hexafluorophosphate  $[\text{Ru}(\text{bpy})_3]^{2+}$  in (a) 0% DES, (b) 10% DES mixture, (c) 30% DES mixture, (d) 50% DES mixture, (e) 70% DES mixture, (f) 90% DES mixture and (g) 100% DES mixture.

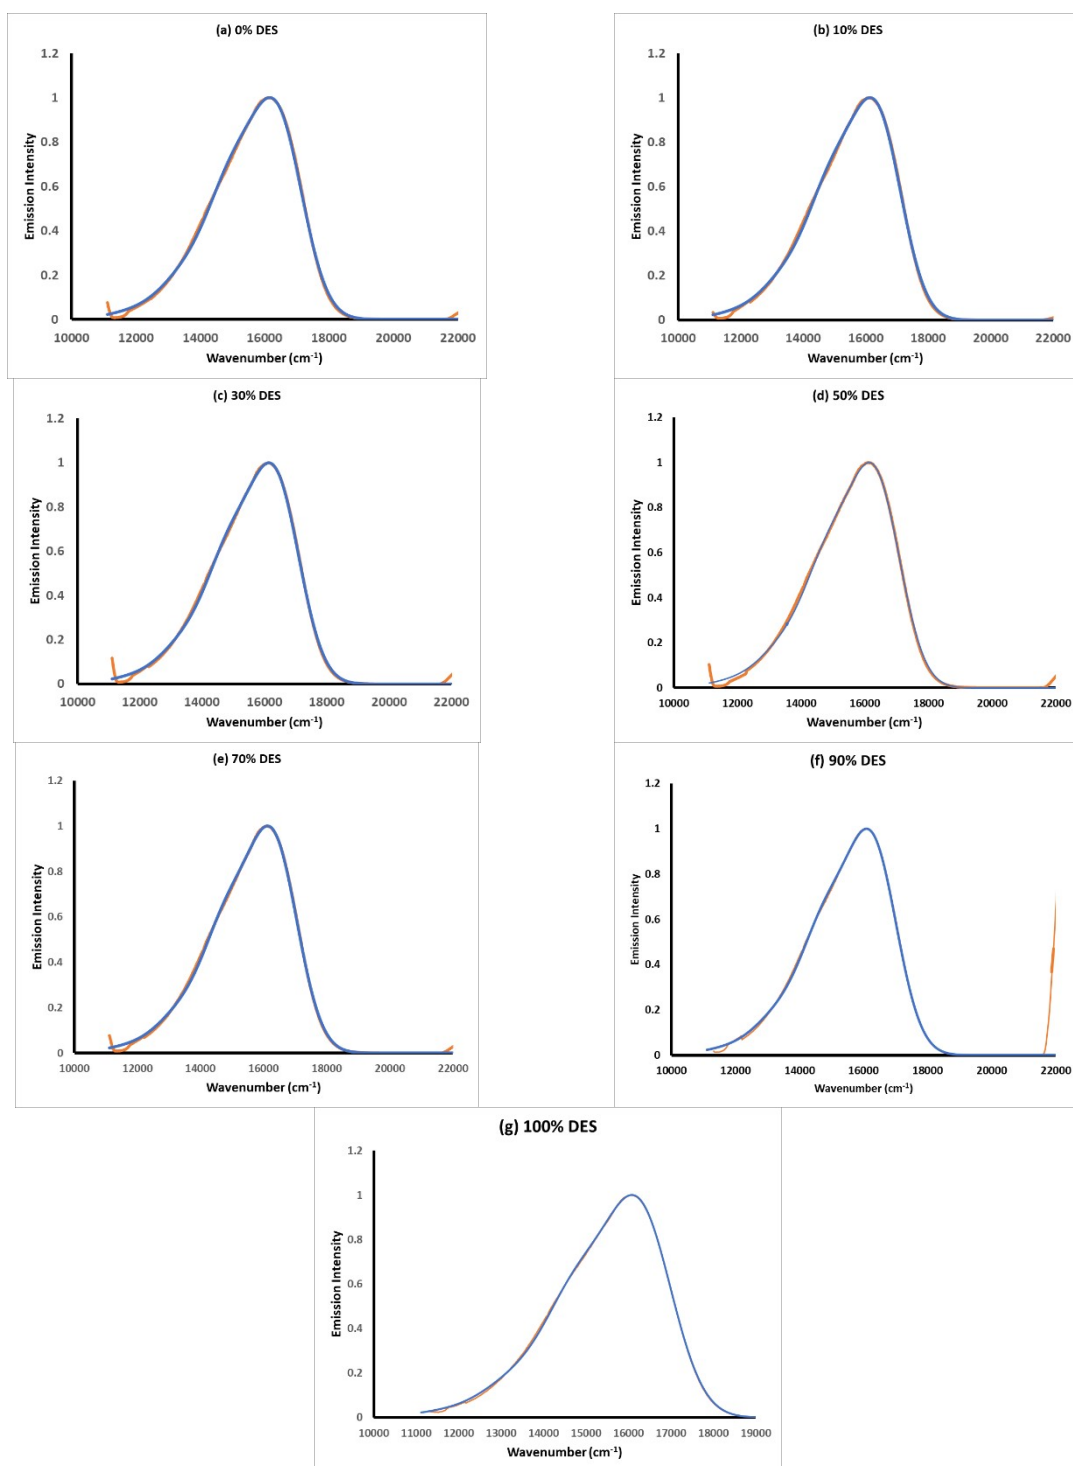

**Fig. S8.** Emission spectral fitting (blue = calculated; orange = corrected) of tris(2,2'-bipyridine) ruthenium (II) hexafluorophosphate  $[\text{Ru}(\text{bpy})_3]^{2+}$  in (a) 0% DES, (b) 10% DES mixture, (c) 30% DES mixture, (d) 50% DES mixture, (e) 70% DES mixture, (f) 90% DES mixture and (g) 100% DES mixture.

#### 4. Electrochemical data for $[\text{Ru}(\text{bpy})_3]^{2+}$ and quenchers

**Table S2.** Redox ( $E_{1/2}$ ) potentials (V) of  $[\text{Ru}(\text{bpy})_3]^{2+}$  and all the quenchers used vs Ag/AgCl.

| DES        | $[\text{Ru}(\text{bpy})_3]^{2+}$ | DPV   | BV    | MV    | DHB   | DMPP-DB | EV    | THDDP-DB | DMDHP-DB | TMBP- $I_2$ |
|------------|----------------------------------|-------|-------|-------|-------|---------|-------|----------|----------|-------------|
| <b>0</b>   | 1.114                            | -0.36 | -0.46 | -0.56 | -0.59 | -0.69   | -0.71 | -0.90    | -0.86    | -0.95       |
| <b>10</b>  | 1.114                            | -0.36 | -0.53 | -0.63 | -0.47 | -0.69   | -0.62 | -0.92    | -0.87    | -0.95       |
| <b>30</b>  | 1.114                            | -0.35 | -0.46 | -0.62 | -0.44 | -0.69   | -0.61 | -0.92    | -0.87    | -0.97       |
| <b>50</b>  | 1.114                            | -0.34 | -0.46 | -0.58 | -0.43 | -0.66   | -0.58 | -0.92    | -0.87    | -0.97       |
| <b>70</b>  | 1.114                            | -0.34 | -0.46 | -0.54 | -0.41 | -0.63   | -0.56 | -0.91    | -0.79    | -0.96       |
| <b>90</b>  | 1.114                            | -0.26 | -0.42 | -0.51 | -0.40 | -0.58   | -0.51 | -0.90    | -0.86    | -0.93       |
| <b>100</b> | 1.114                            | -0.26 | -0.41 | -0.48 | -0.38 | -0.55   | -0.48 | -0.89    | -0.71    | -0.92       |

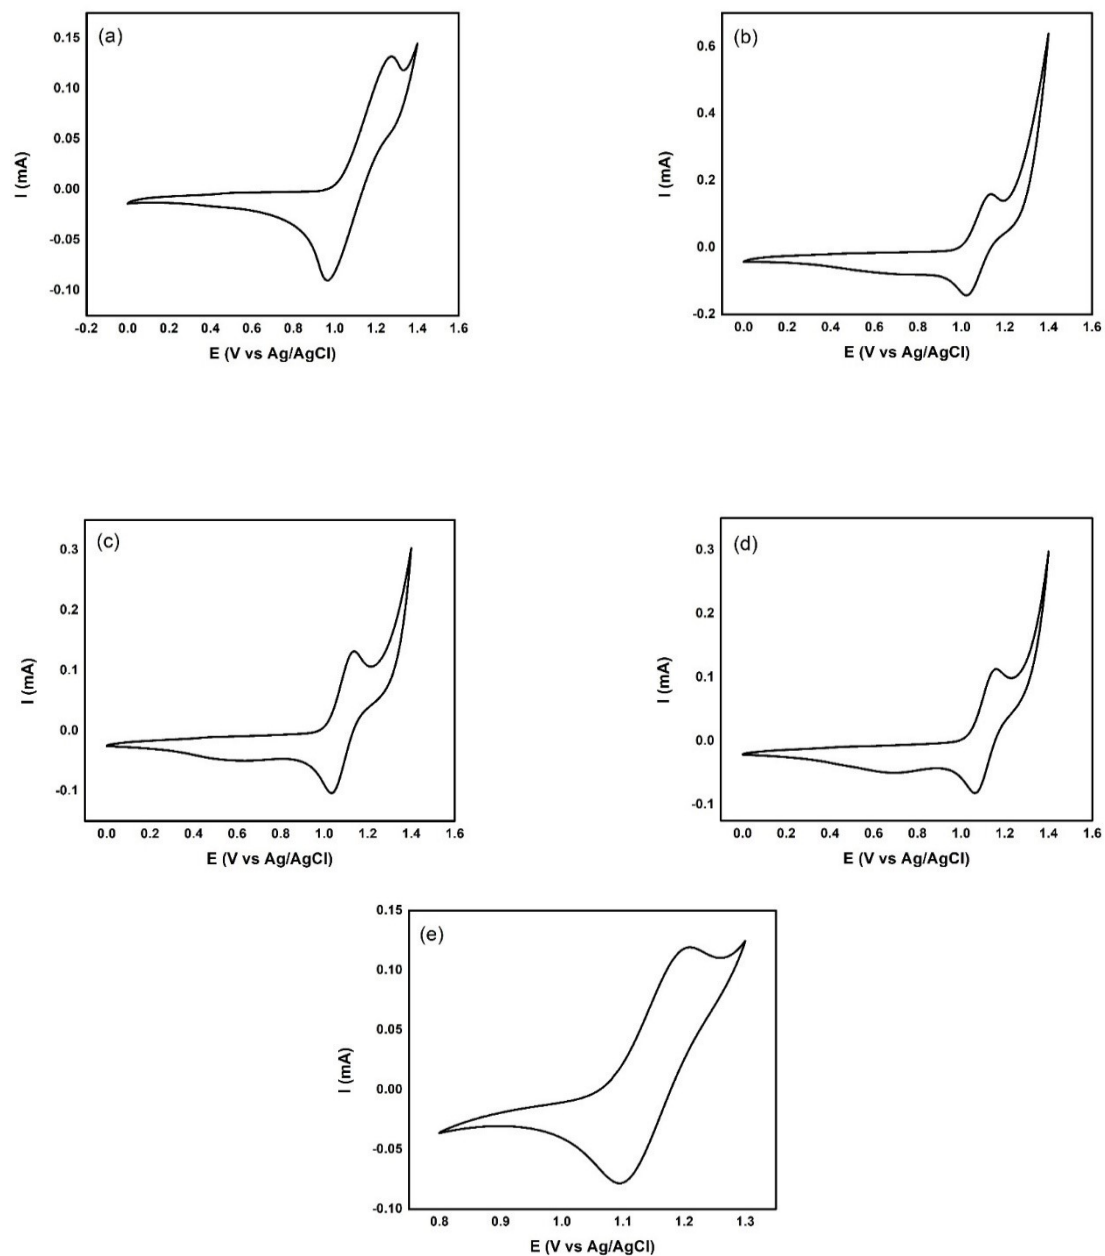

**Fig. S9.** Cyclic voltammety plots of Tris(2,2'-bipyridyl)dichlororuthenium(II) hexahydrate  $[\text{Ru}(\text{bpy})_3]^{2+}$  in (a) 0% DES mixture, (b) 10% DES mixture, (c) 30% DES mixture, (d) 50% DES mixture, and (e) 70% DES mixture.

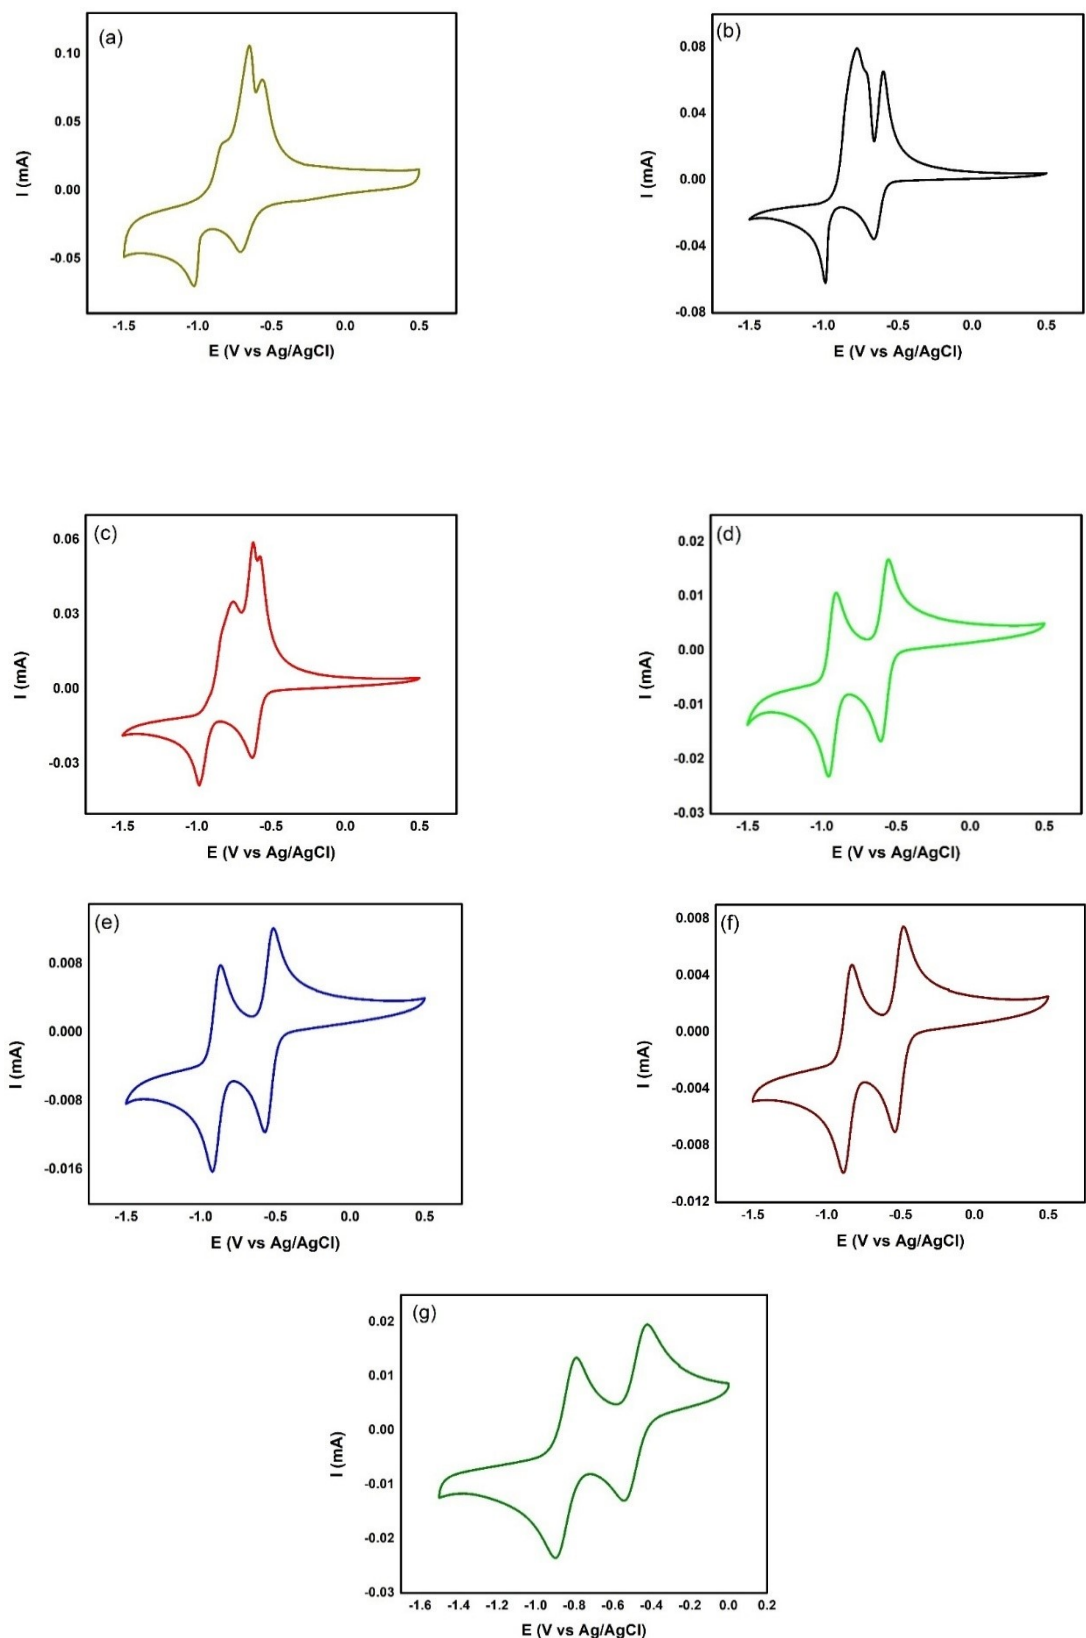

**Fig. S10.** Cyclic voltammety plots of methyl viologen dichloride hydrate (MV) in (a) 0% DES mixture, (b) 10% DES mixture, (c) 30% DES mixture, (d) 50% DES mixture, (e) 70% DES mixture, (f) 90% DES mixture and (g) 100% DES mixture.

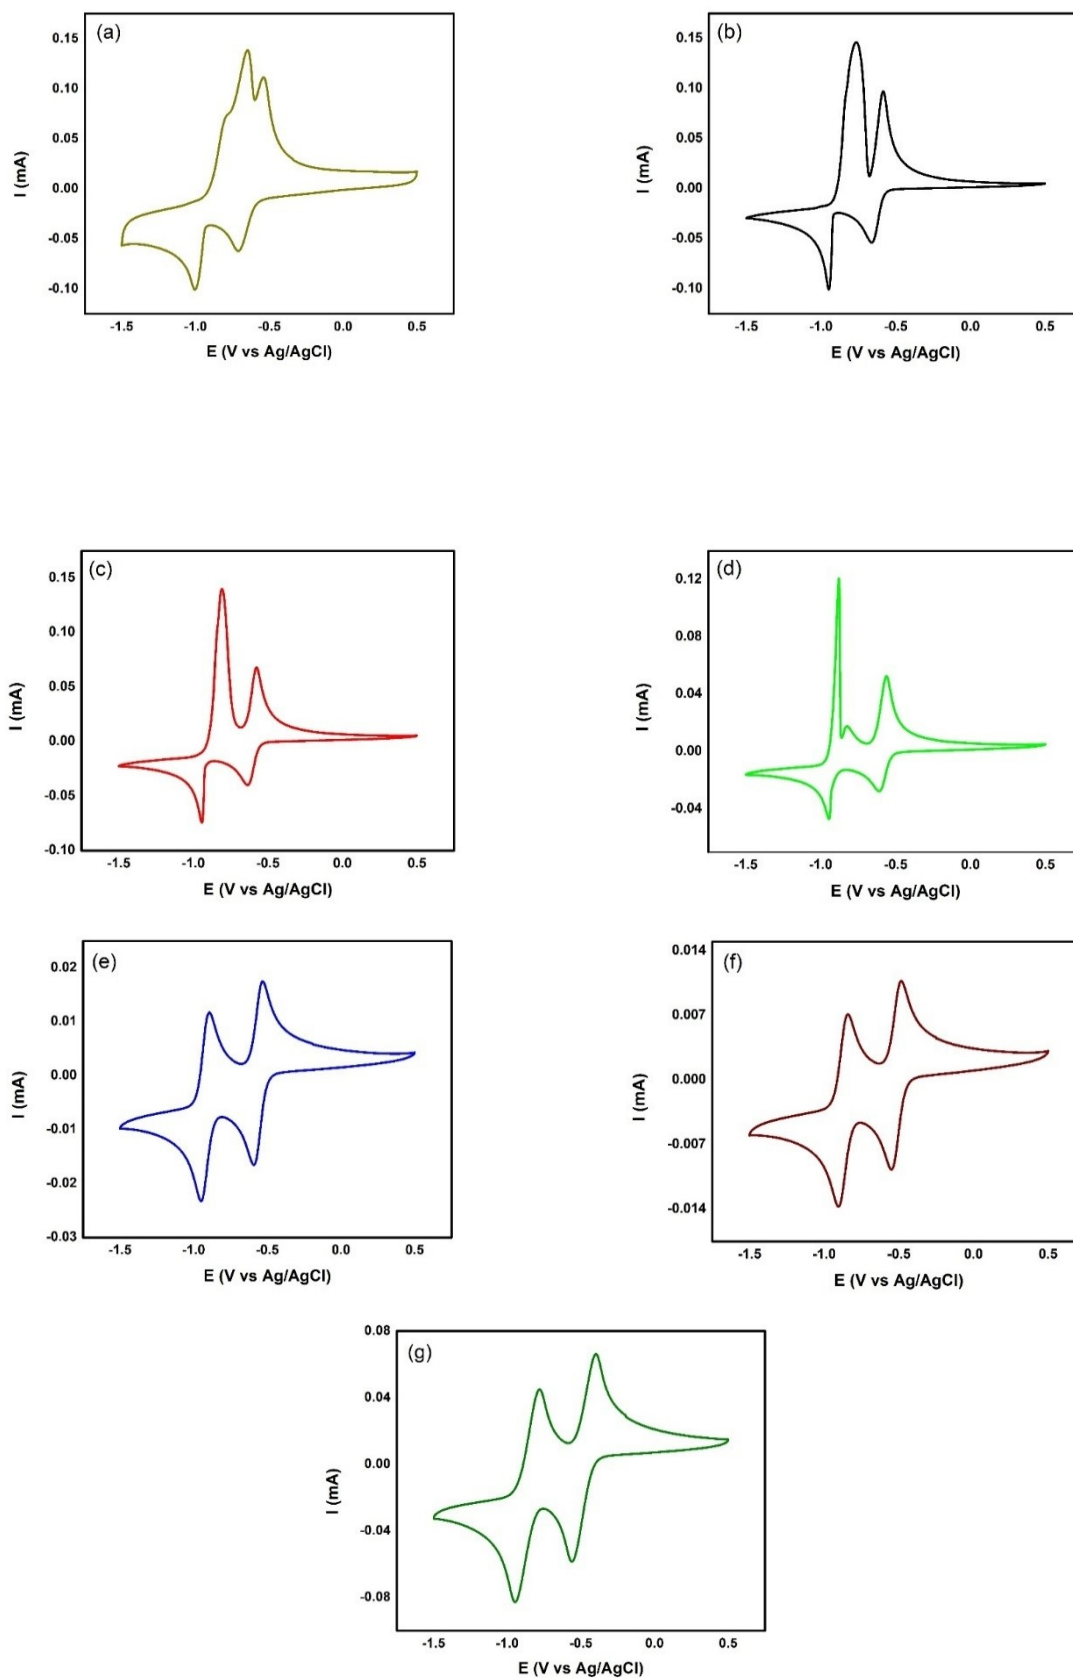

**Fig. S11.** Cyclic voltammetry plots of ethyl viologen dibromide (EV) in (a) 0% DES mixture, (b) 10% DES mixture, (c) 30% DES mixture, (d) 50% DES mixture, (e) 70% DES mixture, (f) 90% DES mixture and (g) 100% DES mixture.

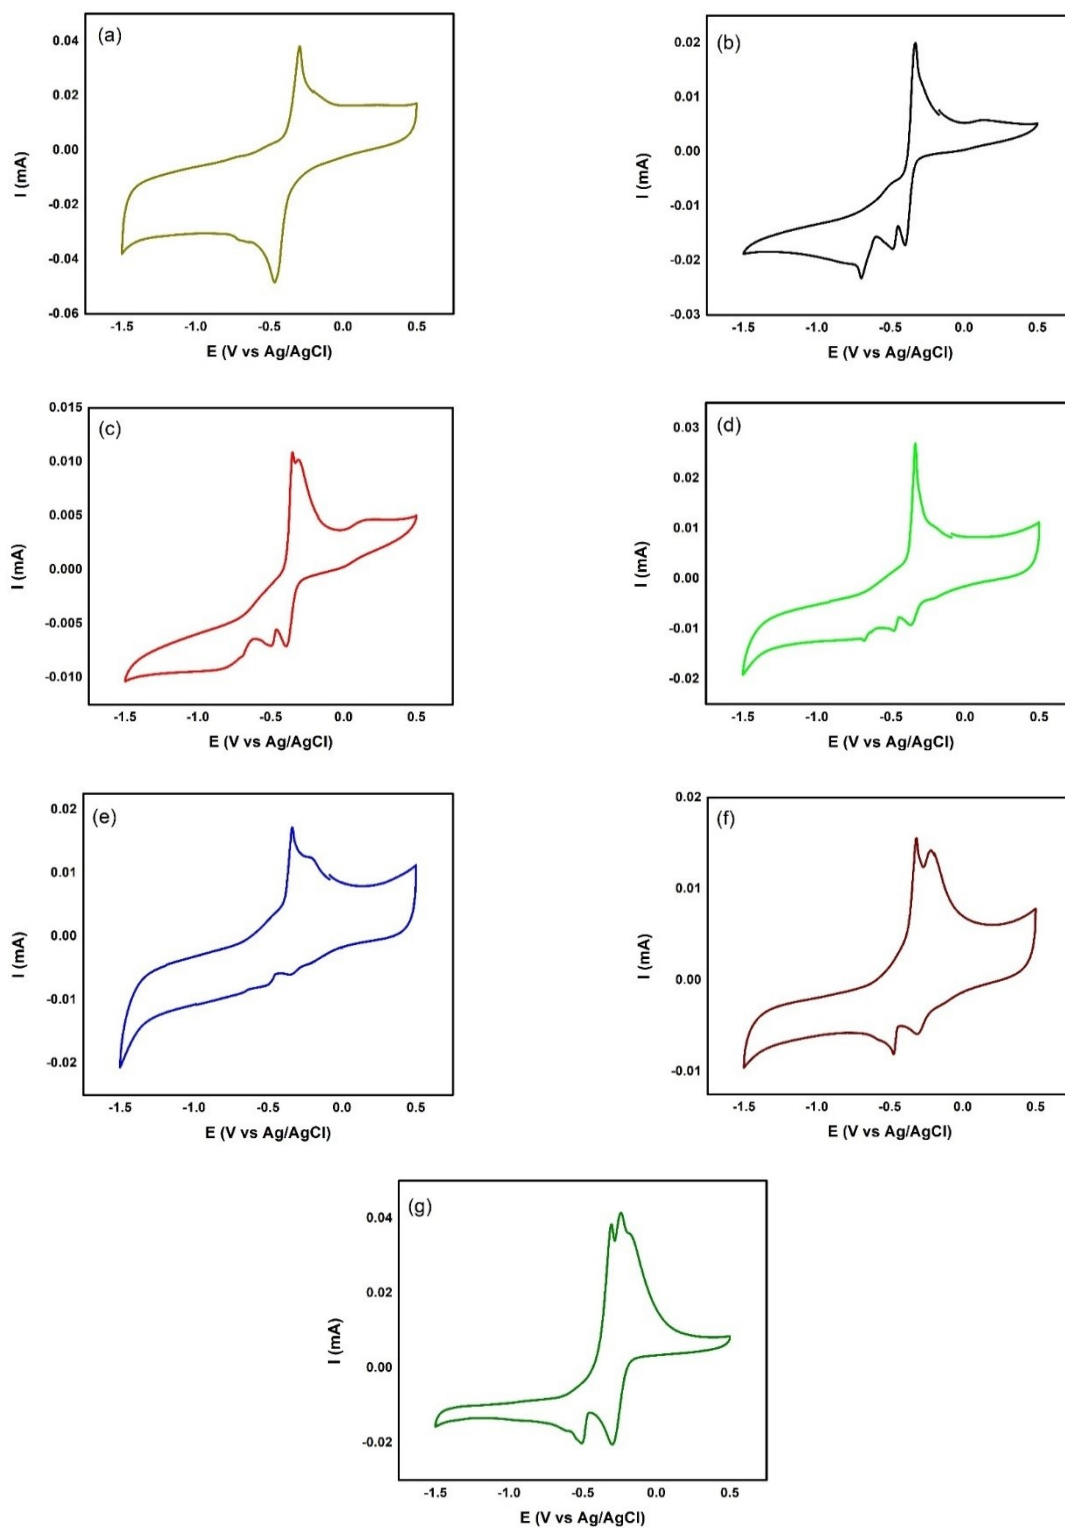

**Fig. S12.** Cyclic voltammetry plots of 1,1'-Diphenyl-[4,4'-bipyridine]-1,1'-dium chloride (DPV) in (a) 0% DES mixture, (b) 10% DES mixture, (c) 30% DES mixture, (d) 50% DES mixture, (e) 70% DES mixture, (f) 90% DES mixture and (g) 100% DES mixture.

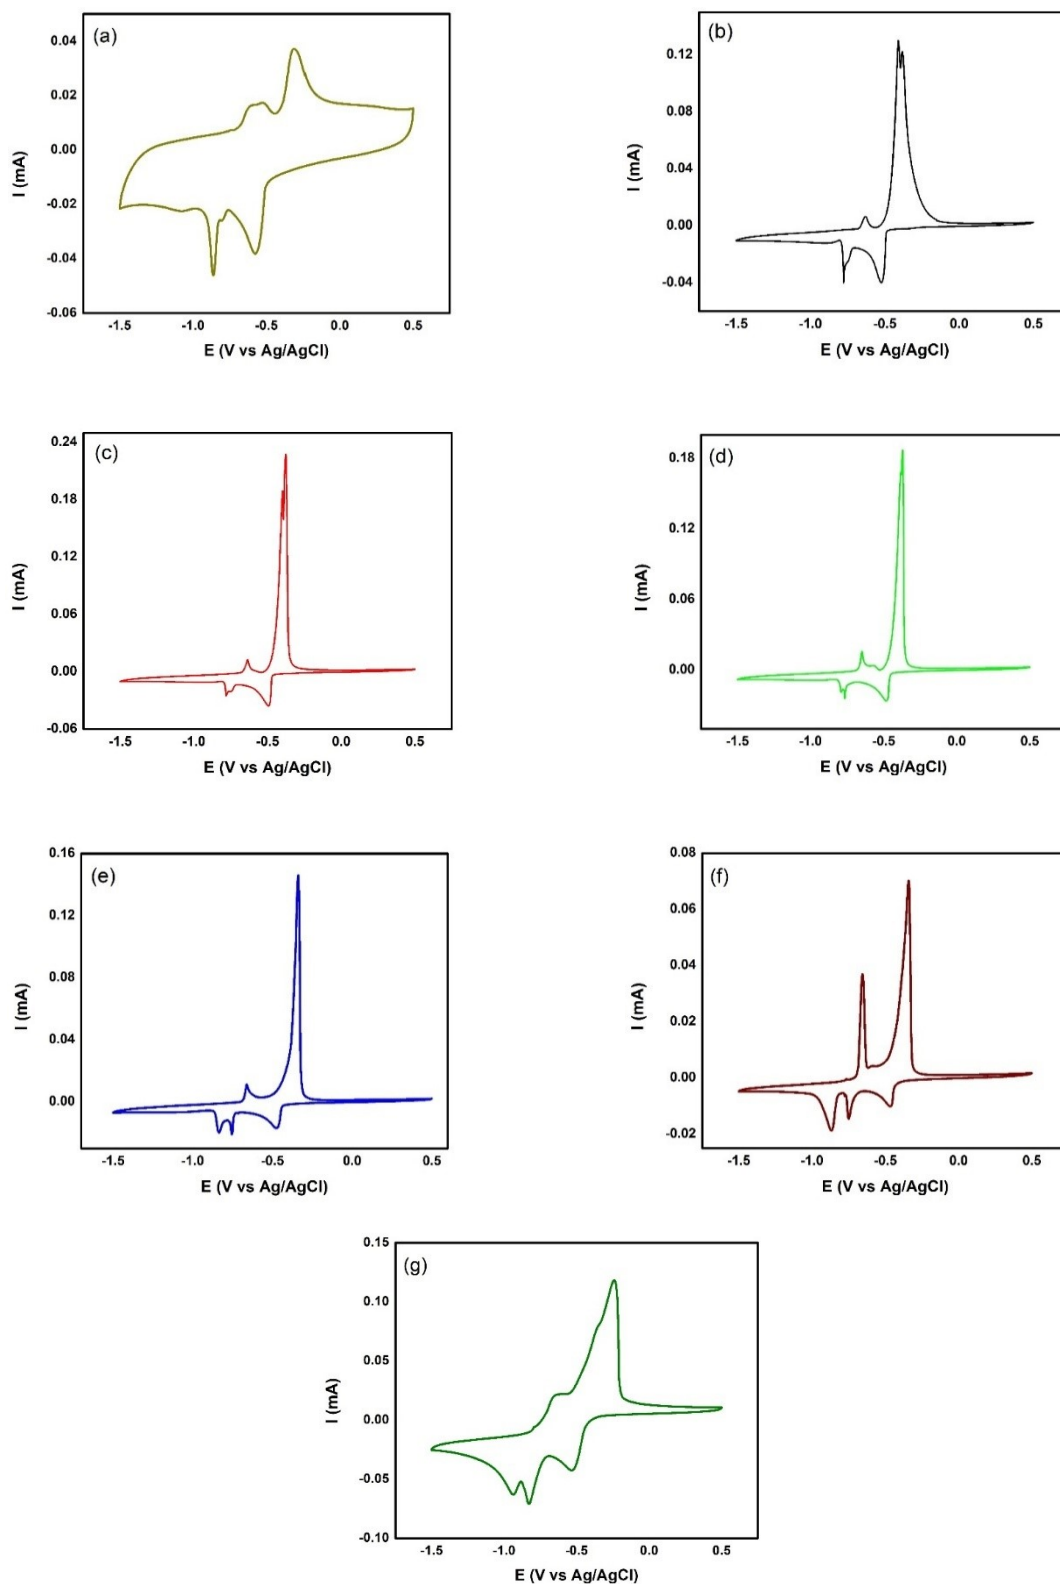

**Fig. S13.** Cyclic voltammetry plots of 1,1'-Diheptyl-4,4'-bipyridinium Dibromide (DHB) in (a) 0% DES mixture, (b) 10% DES mixture, (c) 30% DES mixture, (d) 50% DES mixture, (e) 70% DES mixture, (f) 90% DES mixture and (g) 100% DES mixture.

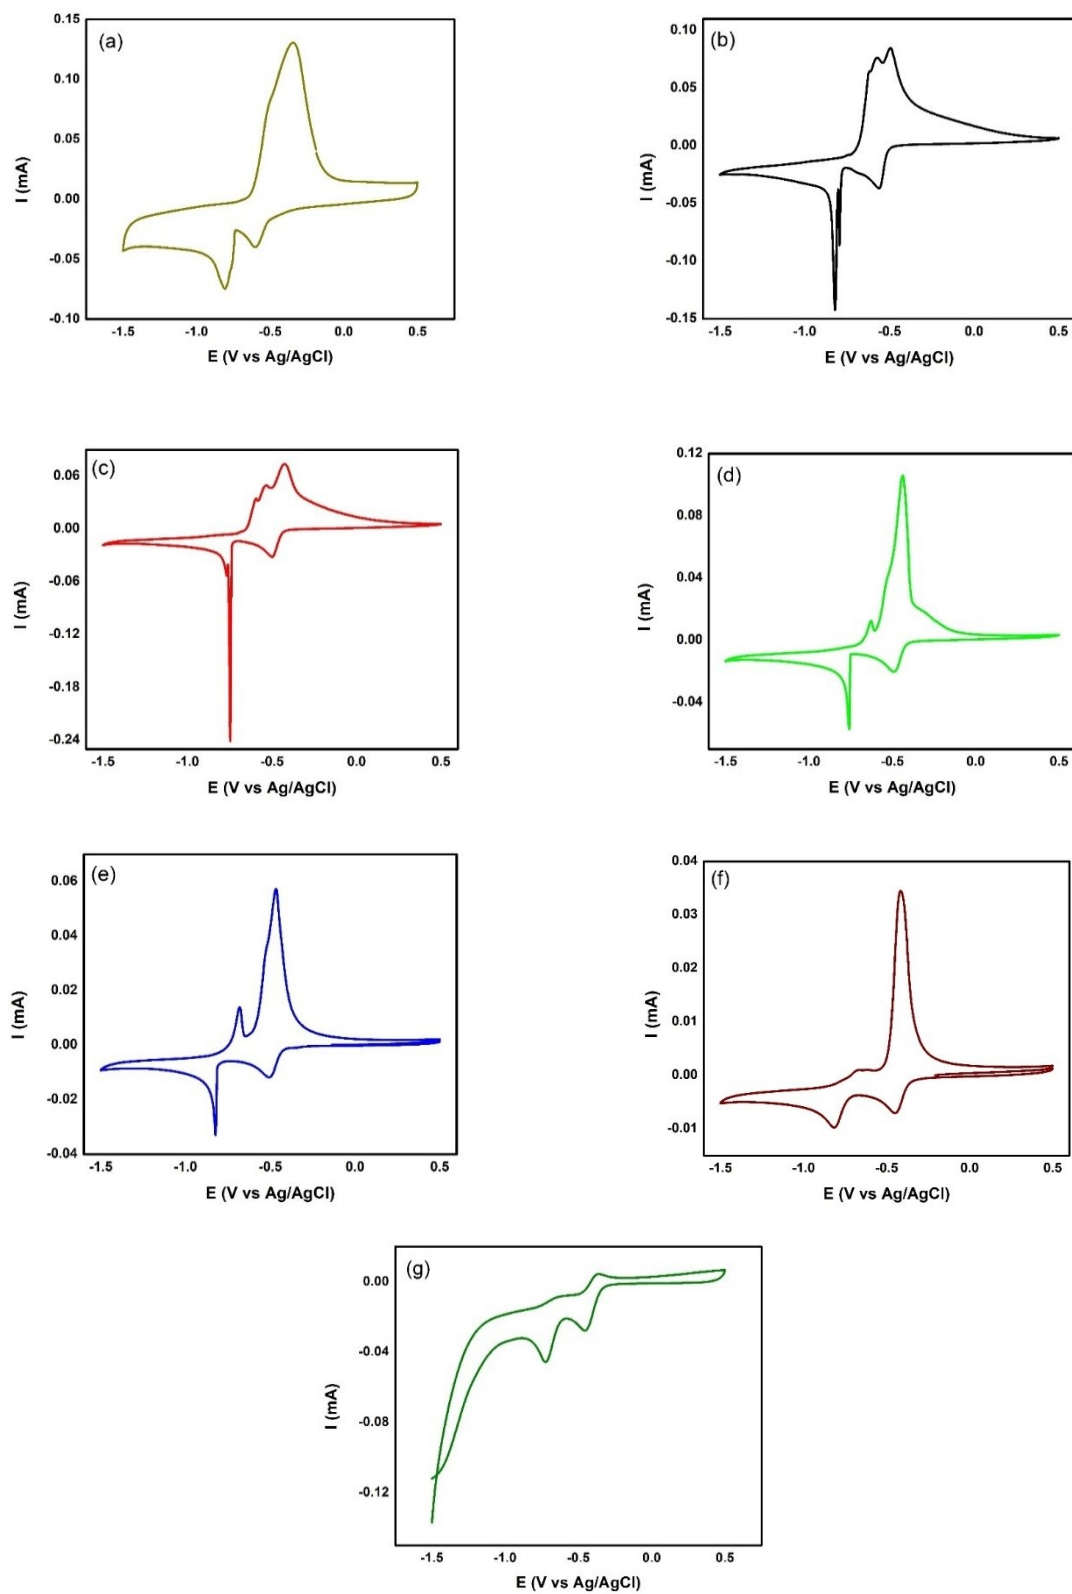

**Fig. S14.** Cyclic voltammetry plots of benzyl viologen dichloride (BV) in (a) 0% DES mixture, (b) 10% DES mixture, (c) 30% DES mixture, (d) 50% DES mixture, (e) 70% DES mixture, (f) 90% DES mixture and (g) 100% DES mixture.

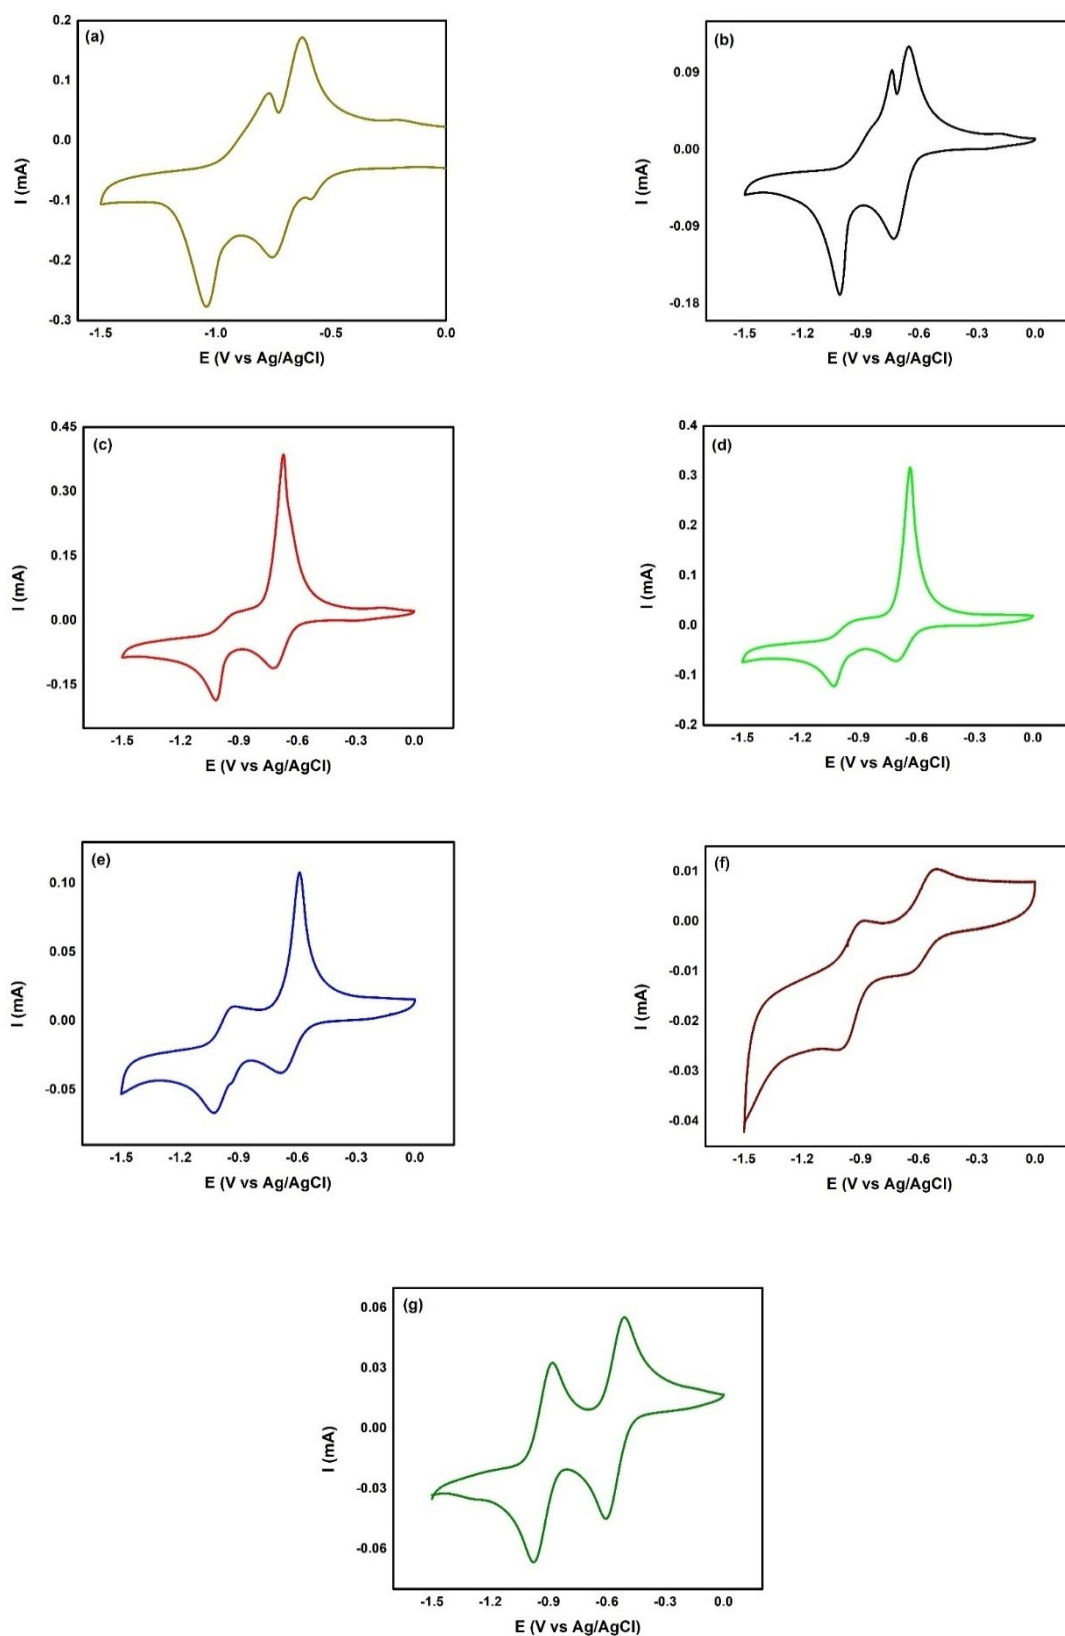

**Fig. S15.** Cyclic voltammety plots of 2,11-Dimethyl-6,7-dihydrodipyrido[1,2-a:2',1'-c]pyrazinedium dibromide (DMPP-DB) in (a) 0% DES mixture, (b) 10% DES mixture, (c) 30% DES mixture, (d) 50% DES mixture, (e) 70% DES mixture, (f) 90% DES mixture and (g) 100% DES mixture.

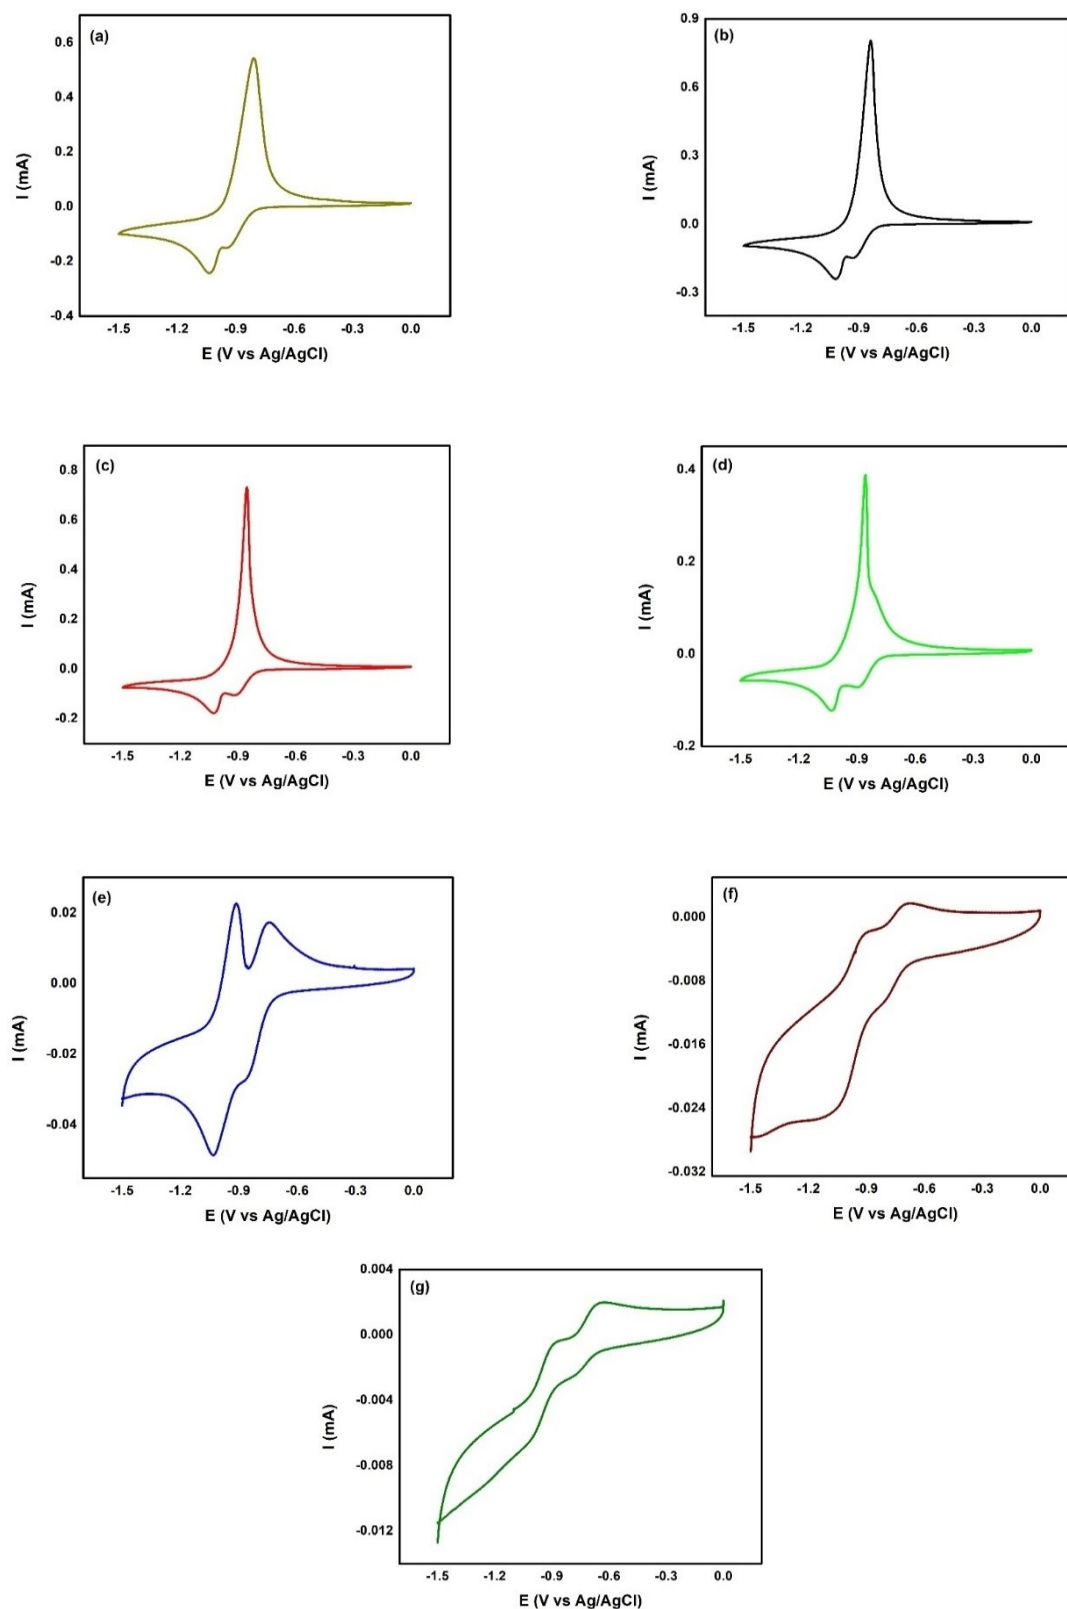

**Fig. S16.** Cyclic voltammety plots of 2,12- Dimethyl-7,8-dihydro-6Ff-dipyrido[1,2-a :2',1'-c ]-[1,4]diazepinium Dibromide (DMDHP-DB) in (a) 0% DES mixture, (b) 10% DES mixture, (c) 30% DES mixture, (d) 50% DES mixture, (e) 70% DES mixture, (f) 90% DES mixture and (g) 100% DES mixture.

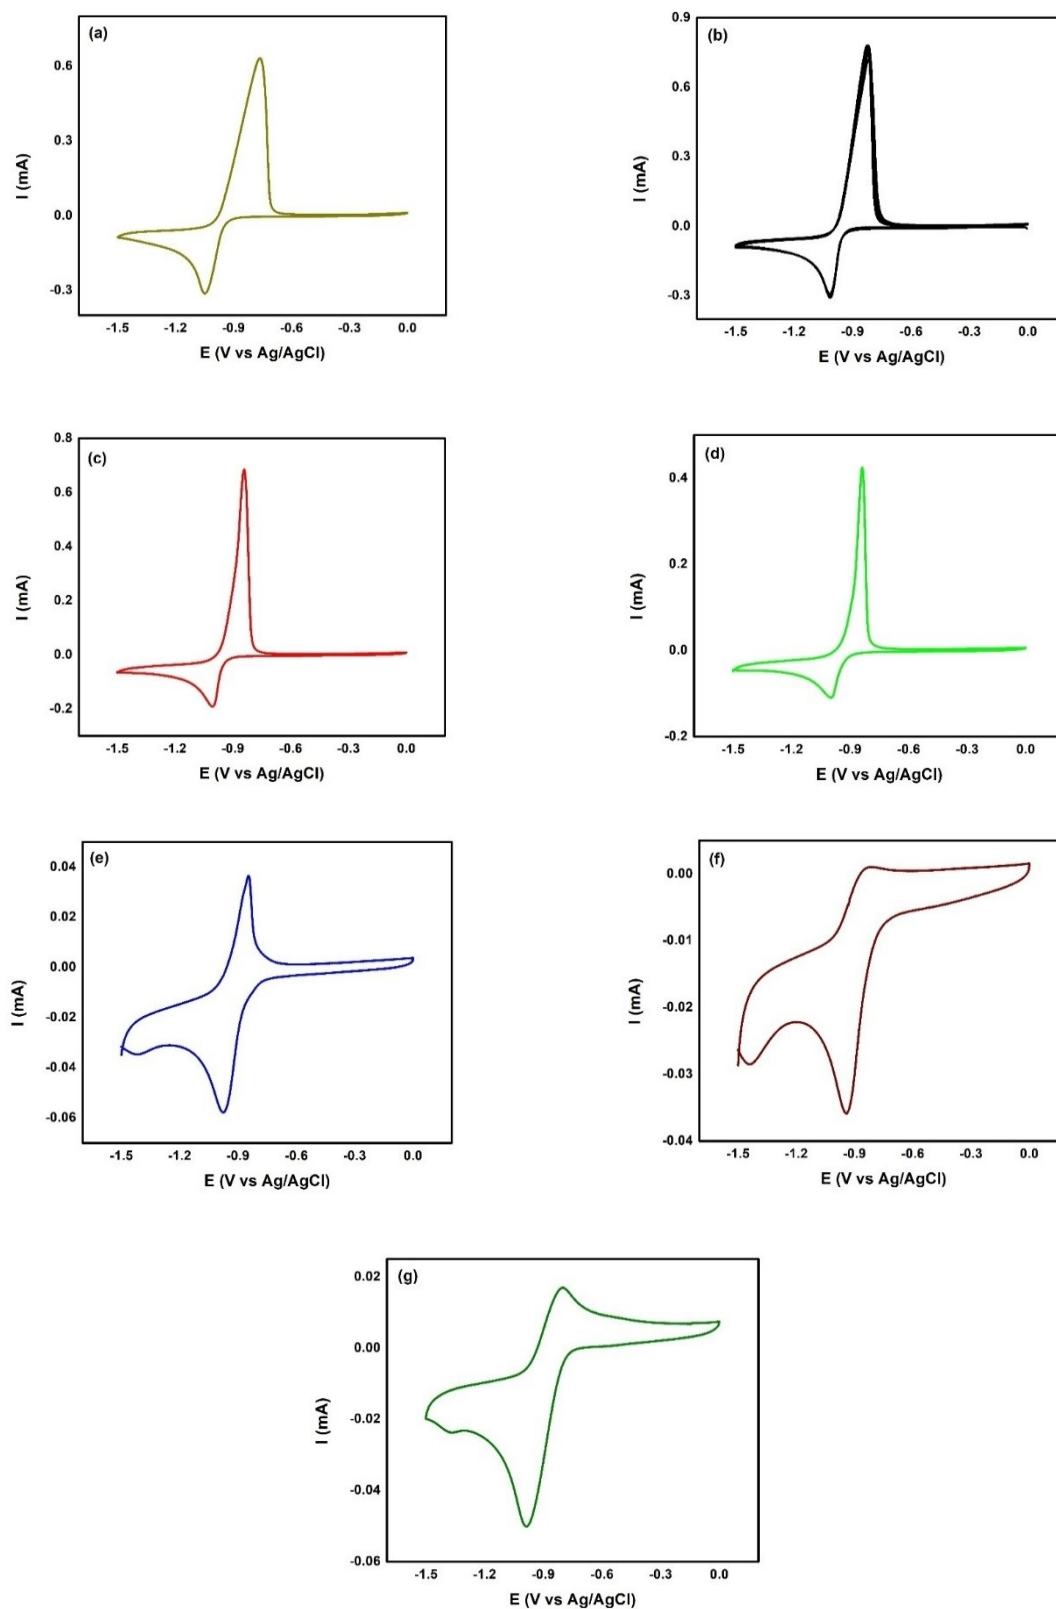

**Fig. S17.** Cyclic voltammety plots of 6,7,8,9-tetrahydro-2,13-dimethyldipyrido<1,2-a:2',1'-c><1,4>diazocinium dibromide (THDDP-DB) in (a) 0% DES mixture, (b) 10% DES mixture, (c) 30% DES mixture, (d) 50% DES mixture, (e) 70% DES mixture, (f) 90% DES mixture and (g) 100% DES mixture.

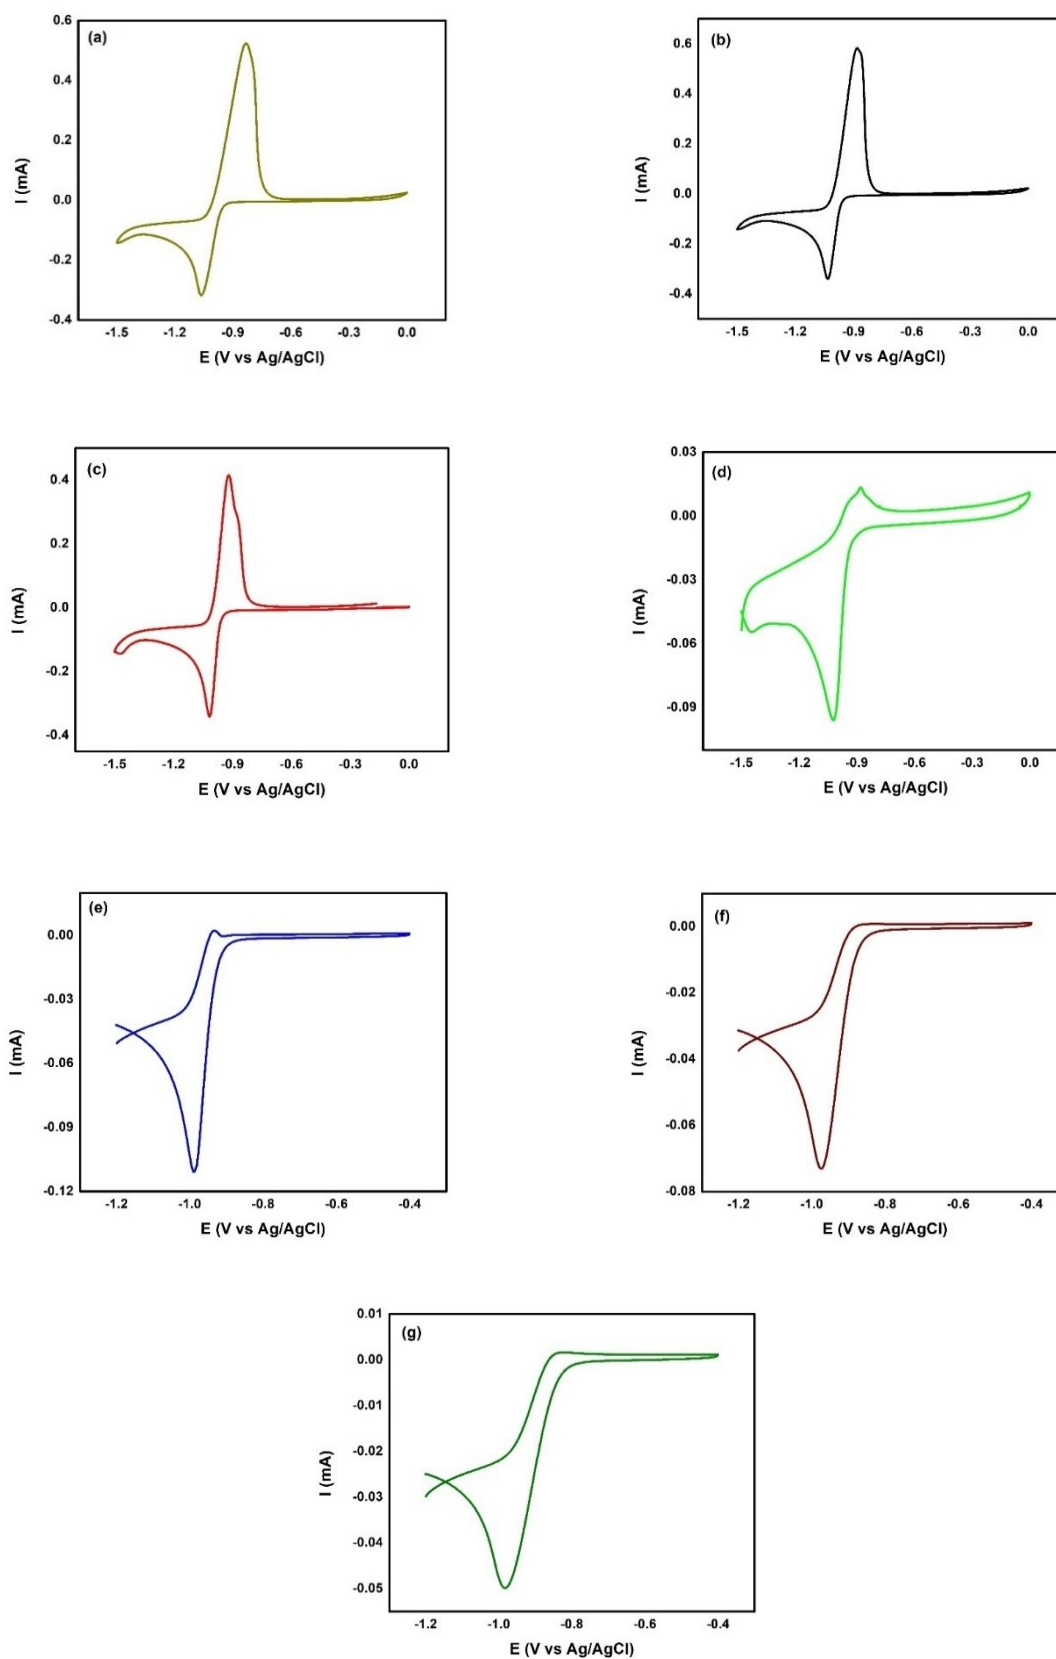

**Fig. S18.** Cyclic voltammetry plots of 1,1',4,4'-Tetramethyl-2,2'-bipyridinium diiodide (TMBP-I<sub>2</sub>) in (a) 0% DES mixture, (b) 10% DES mixture, (c) 30% DES mixture, (d) 50% DES mixture, (e) 70% DES mixture, (f) 90% DES mixture and (g) 100% DES mixture.

## 5. Electron Transfer Data

**Table S3.** The free energy ( $\Delta G_{ET}$  (kcal/mol)) of electron transfer between  $[\text{Ru}(\text{bpy})_3]^{2+}$  and series of quenchers in all DES mixtures using Rehm-Weller analysis.

| DES % | MV     | BV     | EV     | DPV    | DHB    | DMPP-DB | DMDHP-DB | THDDP-DB | TMBP-I <sub>2</sub> |
|-------|--------|--------|--------|--------|--------|---------|----------|----------|---------------------|
| 0     | -7.64  | -10.16 | -7.77  | -13.33 | -10.79 | -8.10   | -4.18    | -3.26    | -2.10               |
| 10    | -8.77  | -11.11 | -8.78  | -14.92 | -11.95 | -8.10   | -3.95    | -2.80    | -2.10               |
| 30    | -9.62  | -12.56 | -9.38  | -15.02 | -12.69 | -8.10   | -3.95    | -2.80    | -1.64               |
| 50    | -9.34  | -11.96 | -9.20  | -14.92 | -12.14 | -7.99   | -3.15    | -2.00    | -0.84               |
| 70    | -9.49  | -11.36 | -9.03  | -14.82 | -11.73 | -8.08   | -4.39    | -1.63    | -0.47               |
| 90    | -9.63  | -11.74 | -9.38  | -14.76 | -12.77 | -8.64   | -2.18    | -1.26    | -0.57               |
| 100   | -10.94 | -12.56 | -10.94 | -16.02 | -13.25 | -9.33   | -5.64    | -1.49    | -0.80               |

### 5.1 The free energy ( $\Delta G$ ) calculation from Marcus analysis

$$k_q = k_q^0 e^{\left(\frac{-\Delta G^\ddagger}{RT}\right)} \quad (S2a)$$

$$\Delta G^\ddagger = \frac{\lambda}{4} \left(1 + \frac{\Delta G_0}{\lambda}\right)^2 \quad (S2b)$$

Here  $k_q^0$  is the pre-exponential factor (maximum quenching rate when  $\Delta G_0 = -\lambda$ ),  $\lambda$  is reorganization energy,  $\Delta G_0$  is free energy change and  $\Delta G^\ddagger$  is the activation barrier for electron transfer.<sup>1</sup> The calculated  $\Delta G$  values for electron transfer between RuBpy-quenchers in all ethaline mixtures is given in Table S4 below. The plot between  $\ln k_q$  vs  $\Delta G$  were used to derive  $k_q^0$  and  $\lambda$ , and the data is listed in Table S5 below.

**Table S4.** The free energy ( $\Delta G_{ET}(eV)$ ) of electron transfer between  $[Ru(bpy)_3]^{2+}$  and series of quenchers in all DES mixtures using Marcus analysis.

| DES% | BV     | MV     | DHB    | EV     | DPV    | THDDP-DB | DMDHP-DB | TMBP-I <sub>2</sub> | DMPP-DB |
|------|--------|--------|--------|--------|--------|----------|----------|---------------------|---------|
| 0    | -0.319 | -0.210 | -0.346 | -0.216 | -0.457 | -0.020   | -0.060   | 0.030               | -0.230  |
| 10   | -0.357 | -0.256 | -0.393 | -0.256 | -0.522 | 0.004    | -0.046   | 0.034               | -0.226  |
| 30   | -0.418 | -0.290 | -0.423 | -0.279 | -0.524 | 0.006    | -0.044   | 0.056               | -0.224  |
| 50   | -0.424 | -0.311 | -0.432 | -0.305 | -0.553 | 0.008    | -0.042   | 0.058               | -0.252  |
| 70   | -0.422 | -0.341 | -0.438 | -0.321 | -0.572 | 0.001    | -0.119   | 0.051               | -0.279  |
| 90   | -0.460 | -0.368 | -0.504 | -0.357 | -0.591 | -0.005   | -0.045   | 0.025               | -0.325  |
| 100  | -0.500 | -0.430 | -0.530 | -0.430 | -0.650 | -0.020   | -0.200   | 0.010               | -0.360  |

**Table S5.** Electron transfer parameters derived from Marcus plots.

| DES% | $\lambda$ (eV) | $\lambda$ (kcal/mol) | $K_q^0 \times 10^8$ (L mol <sup>-1</sup> s <sup>-1</sup> ) |
|------|----------------|----------------------|------------------------------------------------------------|
| 0    | 0.44           | 10.146               | 1.30                                                       |
| 10   | 0.44           | 10.146               | 1.20                                                       |
| 30   | 0.43           | 9.916                | 1.20                                                       |
| 50   | 0.40           | 9.224                | 0.90                                                       |
| 70   | 0.45           | 10.377               | 0.30                                                       |
| 90   | 0.44           | 10.146               | 0.31                                                       |
| 100  | 0.44           | 10.146               | 0.060                                                      |

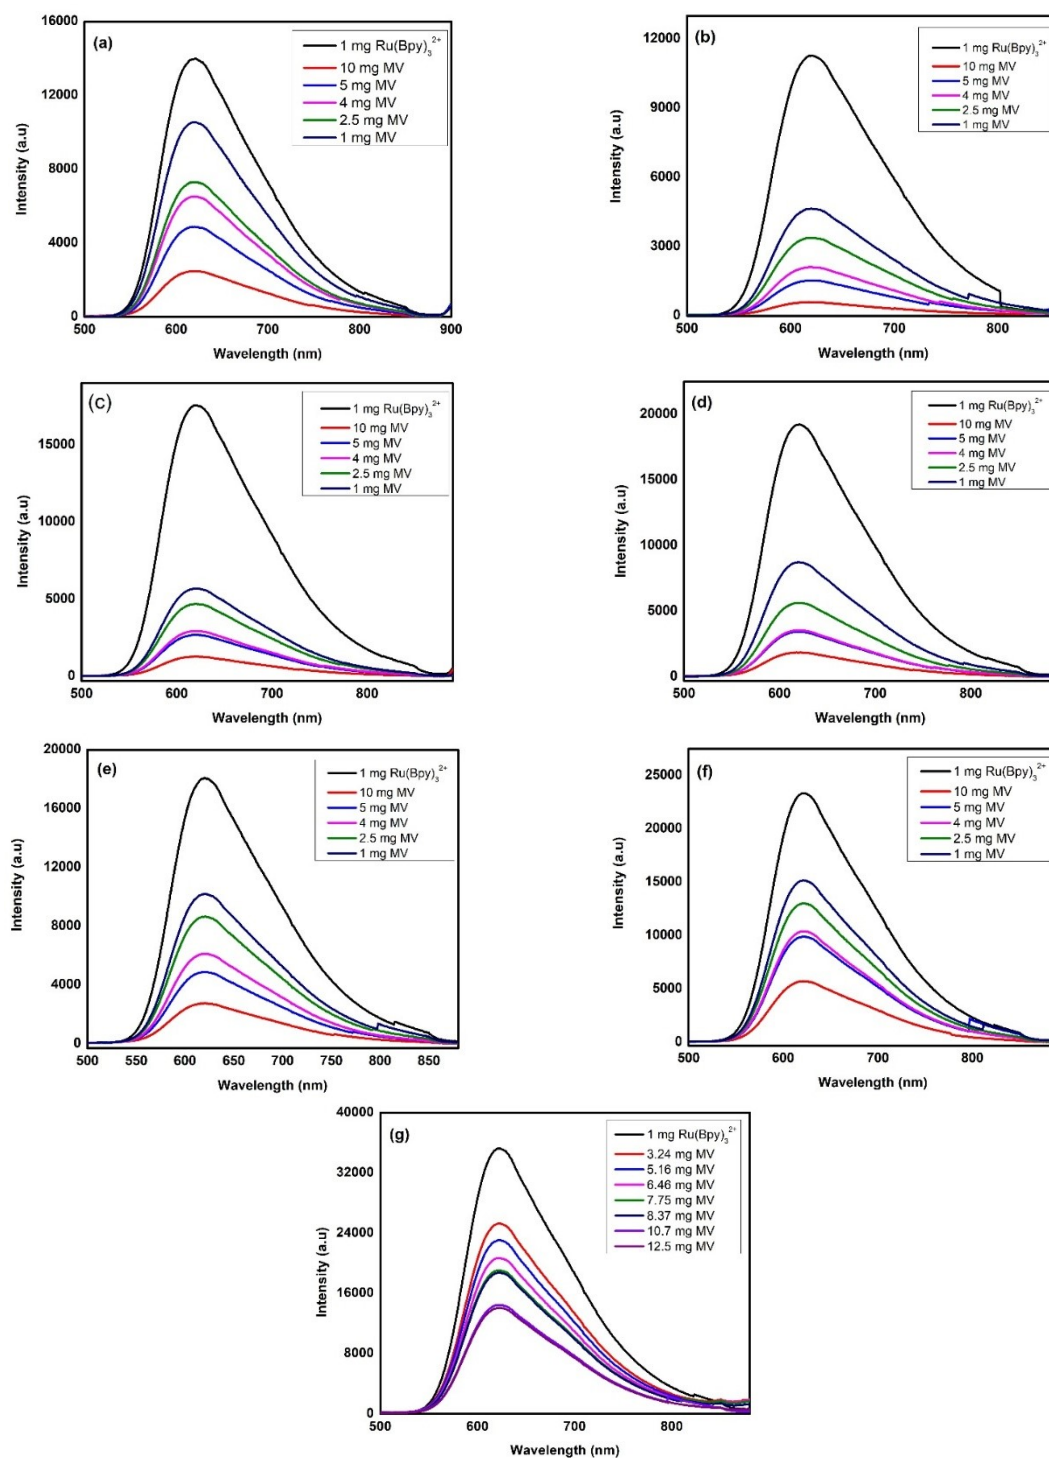

**Fig. S19.** Fluorescence emission spectra ( $\lambda_{\text{excitation}} = 452 \text{ nm}$ ) of methyl viologen dichloride hydrate (MV) in  $[\text{Ru}(\text{bpy})_3]^{2+}$  in (a) 0% DES mixture, (b) 10% DES mixture, (c) 30% DES mixture, (d) 50% DES mixture, (e) 70% DES mixture and (f) 90% DES mixture (g) 100% DES mixture.

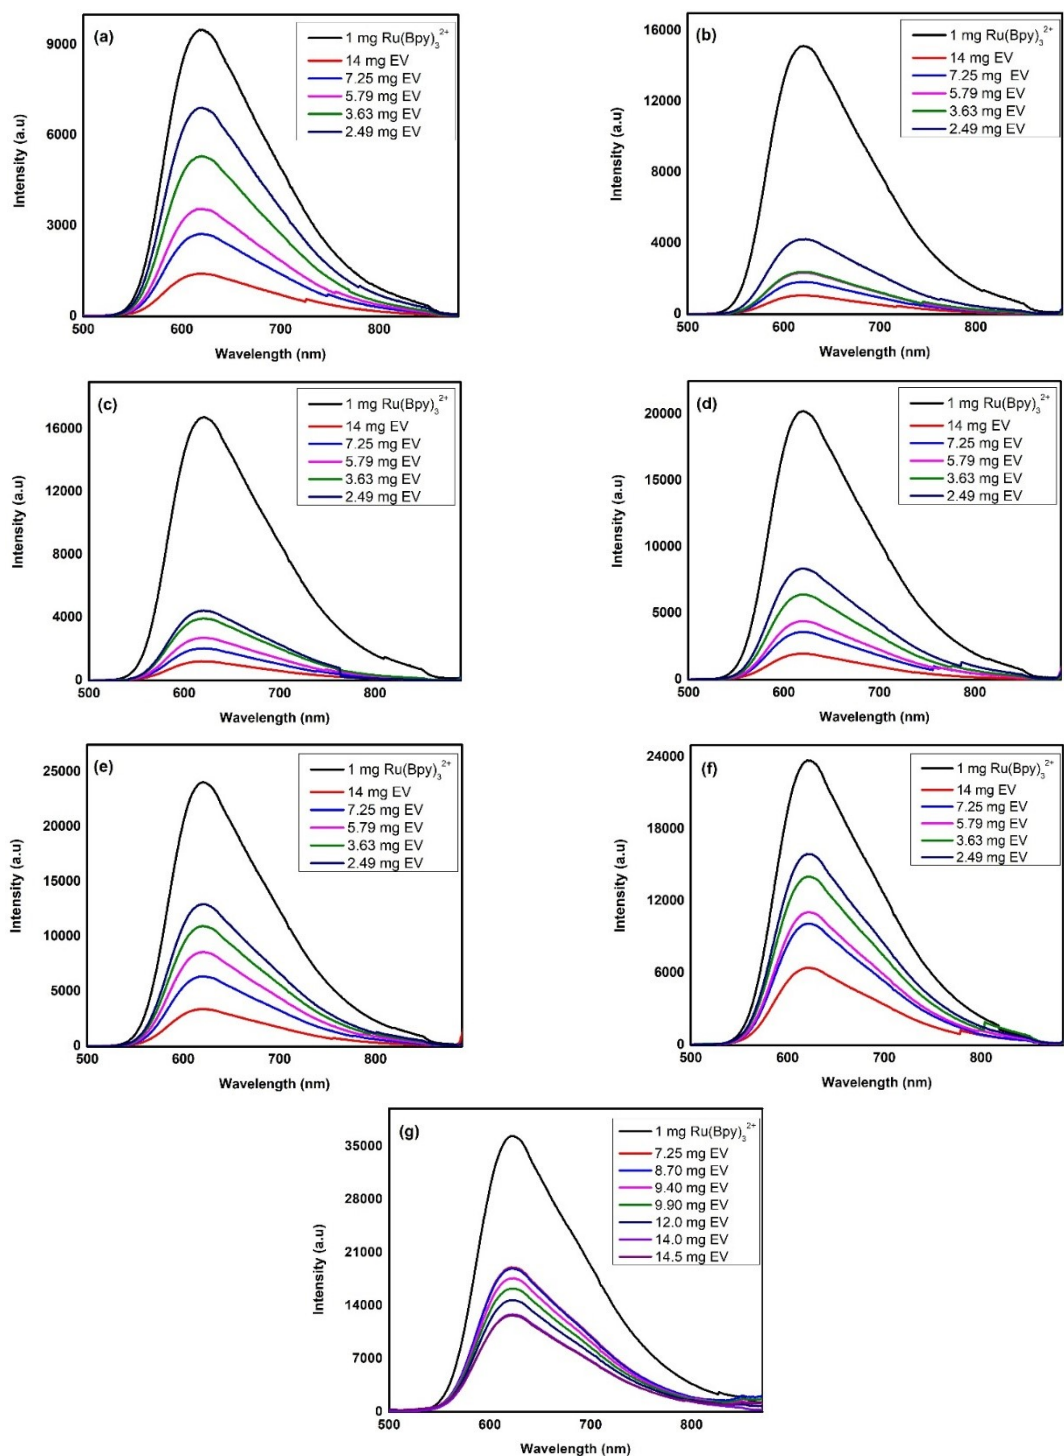

**Fig. S20.** Fluorescence emission spectra ( $\lambda_{\text{excitation}} = 452 \text{ nm}$ ) of ethyl viologen dibromide (EV) in  $[\text{Ru}(\text{bpy})_3]^{2+}$  in (a) 0% DES mixture, (b) 10% DES mixture, (c) 30% DES mixture, (d) 50% DES mixture, (e) 70% DES mixture and (f) 90% DES mixture (g) 100% DES mixture.

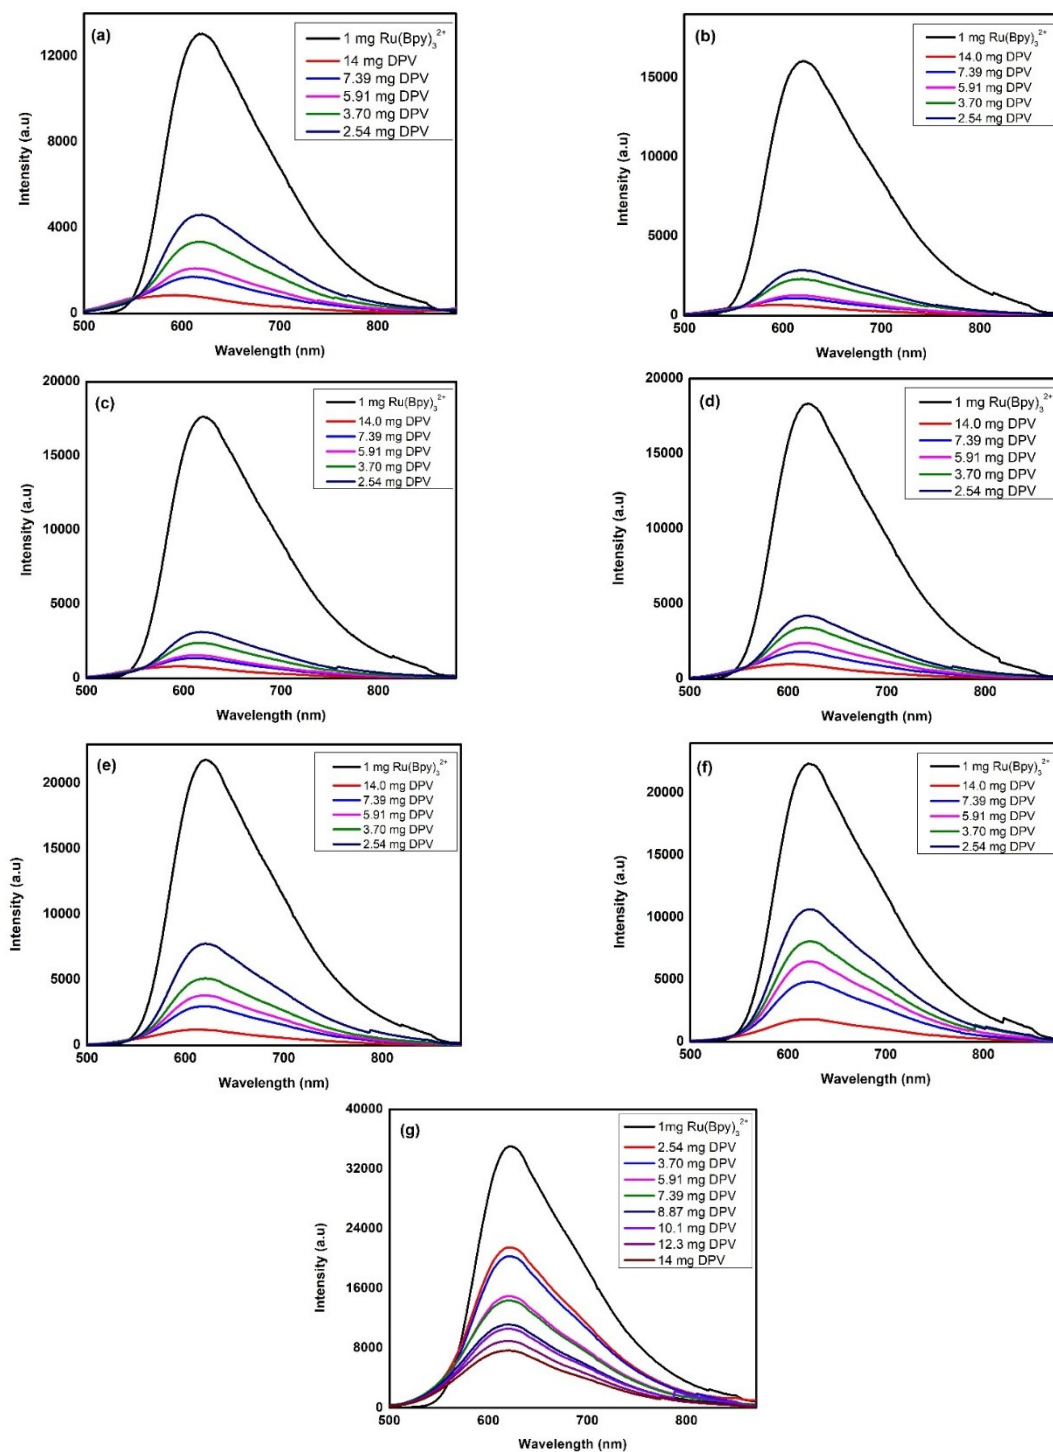

**Fig. S21.** Fluorescence emission spectra ( $\lambda_{\text{excitation}} = 452 \text{ nm}$ ) of 1,1'-Diphenyl-[4,4'-bipyridine]-1,1'-dium chloride (DPV) in (a) 0% DES mixture, (b) 10% DES mixture, (c) 30% DES mixture, (d) 50% DES mixture, (e) 70% DES mixture and (f) 90% DES mixture (g) 100% DES mixture.

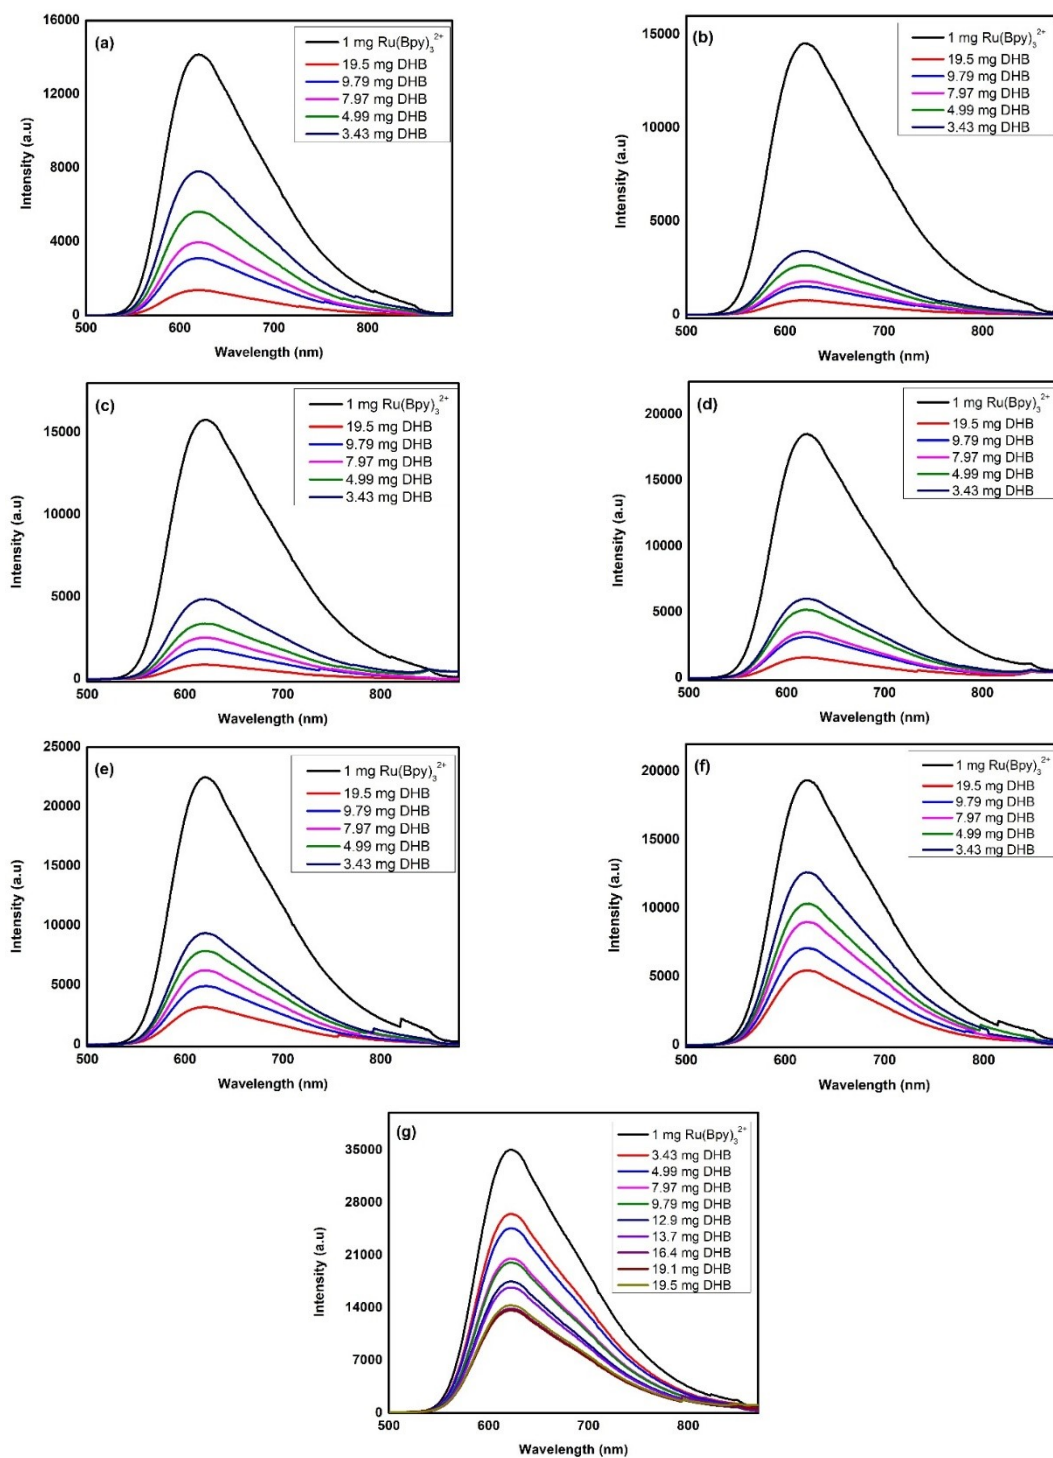

**Fig. S22.** Fluorescence emission spectra ( $\lambda_{\text{excitation}} = 452 \text{ nm}$ ) of 1,1'-Diheptyl-4,4'-bipyridinium Dibromide (DHB) in  $[\text{Ru}(\text{bpy})_3]^{2+}$  in (a) 0% DES mixture, (b) 10% DES mixture, (c) 30% DES mixture, (d) 50% DES mixture, (e) 70% DES mixture and (f) 90% DES mixture (g) 100% DES mixture.

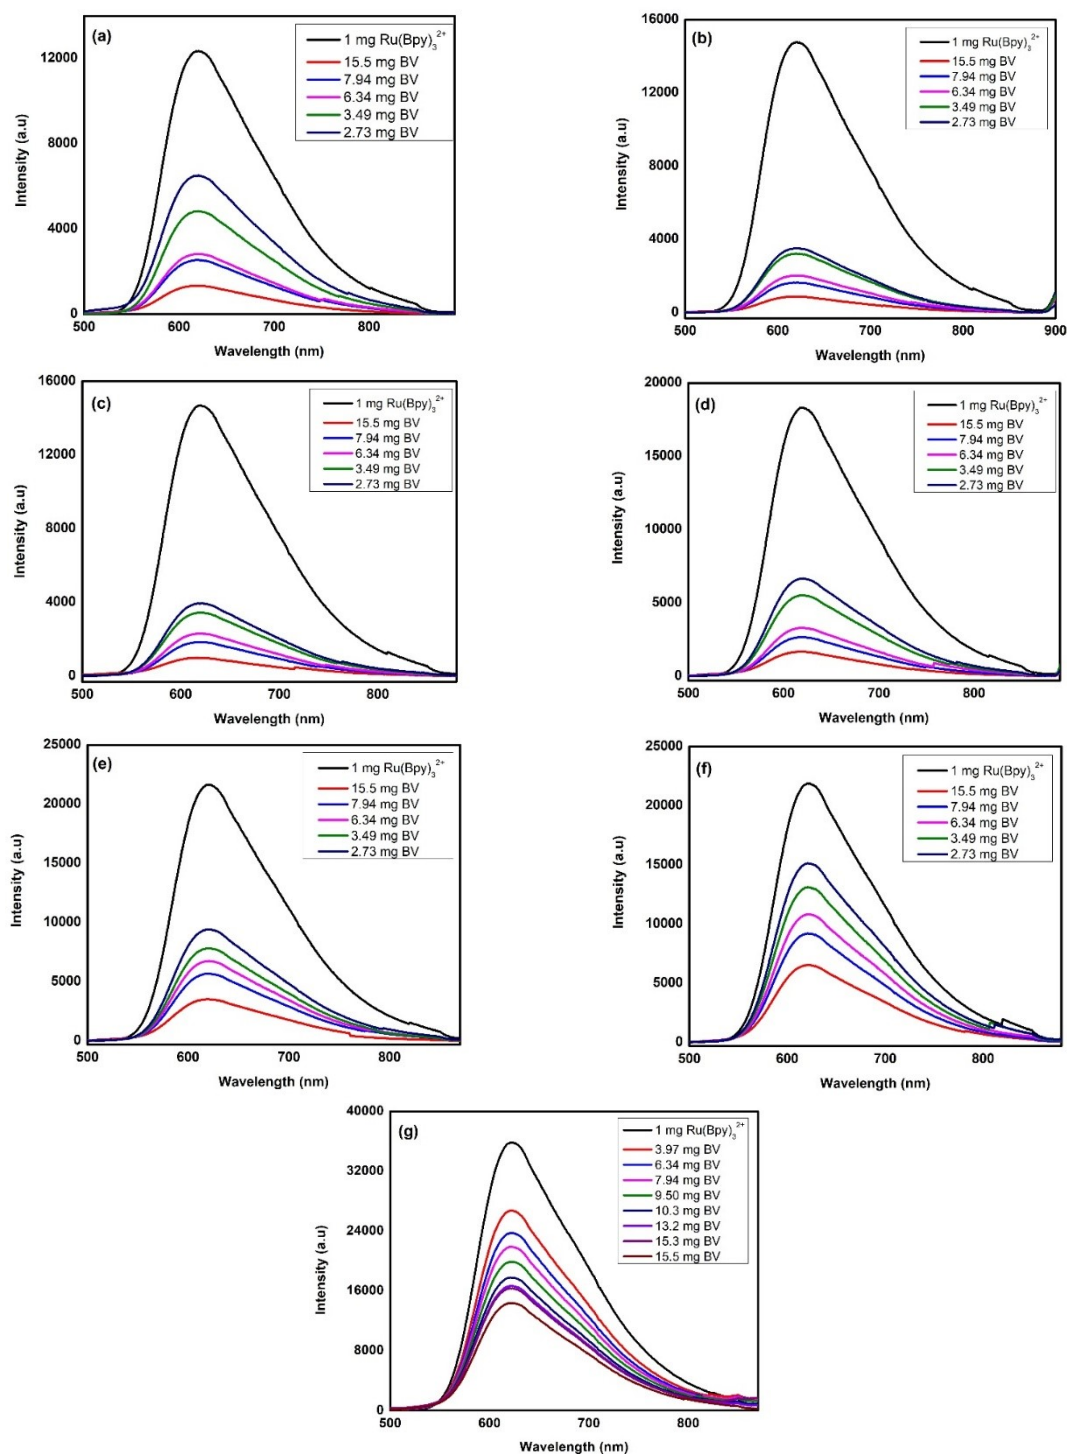

**Fig. S23.** Fluorescence emission spectra ( $\lambda_{excitation} = 452$  nm) of benzyl viologen dichloride (BV) in  $[Ru(bpy)_3]^{2+}$  in (a) 0% DES mixture, (b) 10% DES mixture, (c) 30% DES mixture, (d) 50% DES mixture, (e) 70% DES mixture and (f) 90% DES mixture (g) 100% DES mixture.

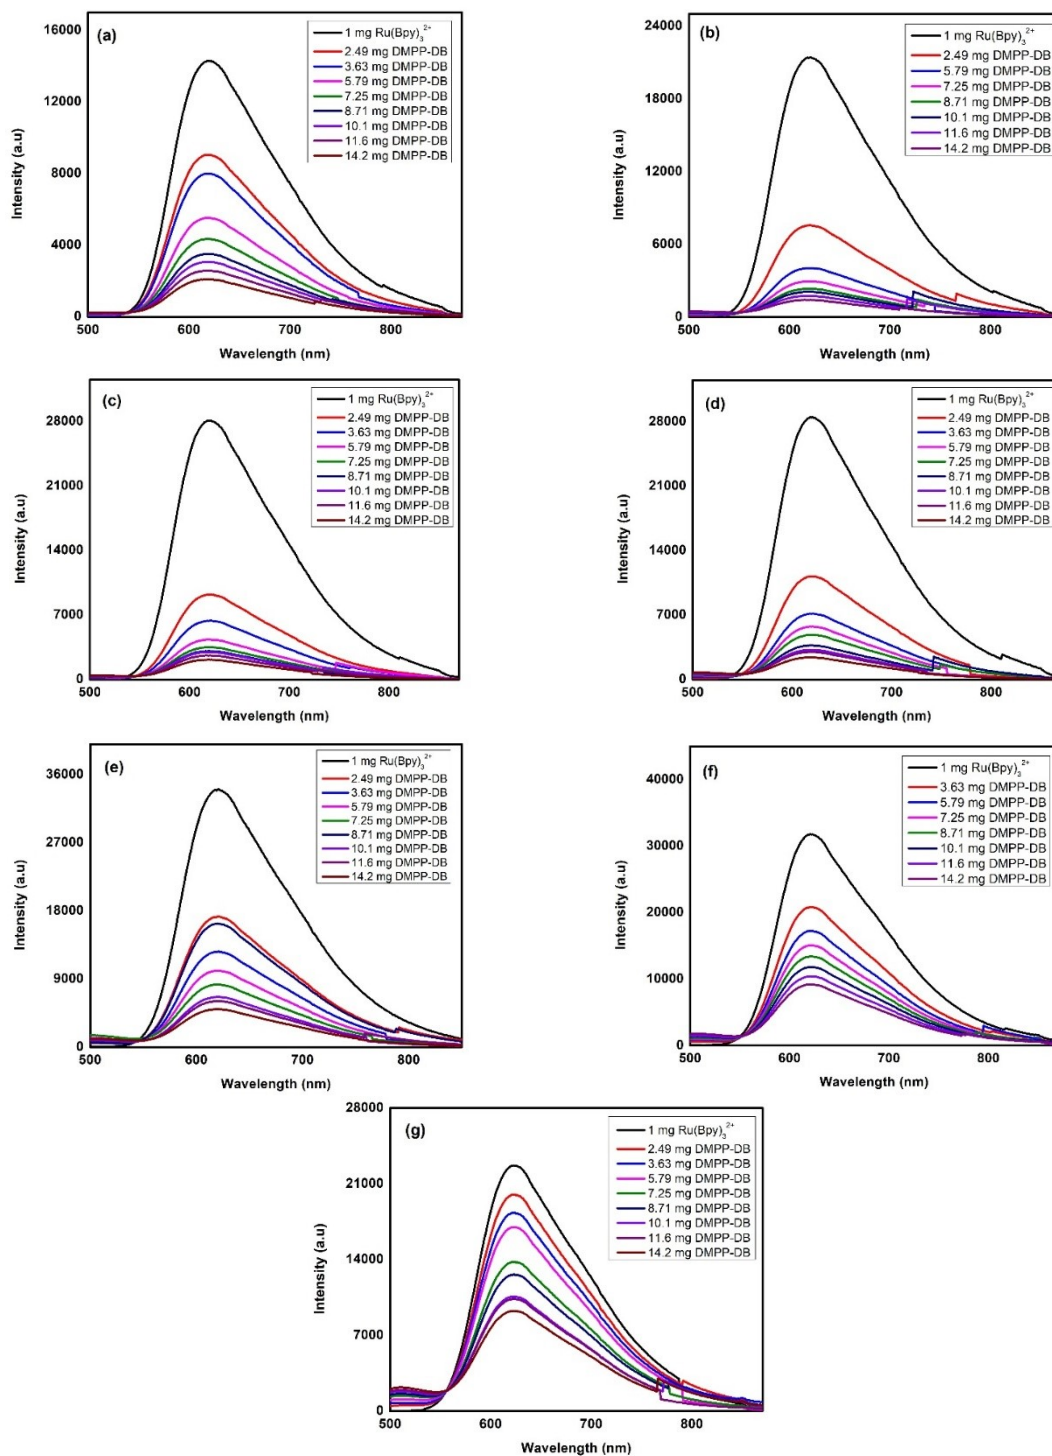

**Fig. S24.** Fluorescence emission spectra ( $\lambda_{\text{excitation}} = 452 \text{ nm}$ ) of 2,11-Dimethyl-6,7-dihydrodipyrido[1,2-a:2',1'-c]pyrazinedium dibromide (DMPP-DB) in  $[\text{Ru}(\text{bpy})_3]^{2+}$  in (a) 0% DES mixture, (b) 10% DES mixture, (c) 30% DES mixture, (d) 50% DES mixture, (e) 70% DES mixture and (f) 90% DES mixture (g) 100% DES mixture.

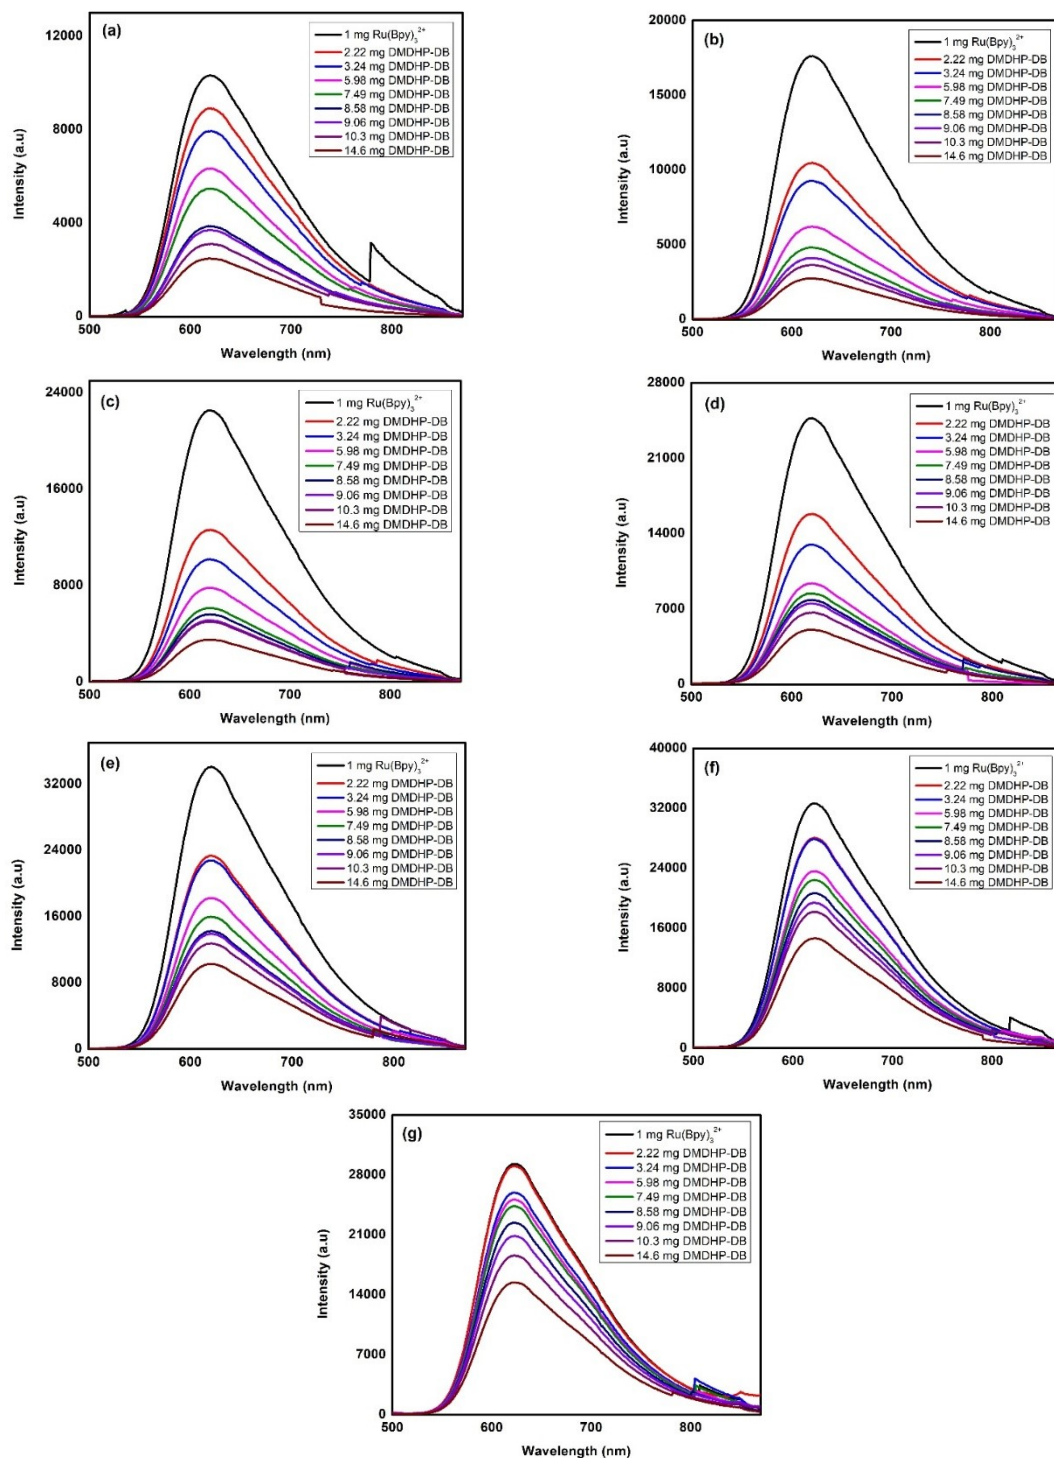

**Fig. S25.** Fluorescence emission spectra ( $\lambda_{\text{excitation}} = 452 \text{ nm}$ ) of 2,12- Dimethyl-7,8-dihydro-6Ff-dipyrido[1,2-a :2',1'-c ]-[1,4]diazepinium Dibromide (DMDHP-DB) in  $[Ru(bpy)_3]^{2+}$  in (a) 0% DES mixture, (b) 10% DES mixture, (c) 30% DES mixture, (d) 50% DES mixture, (e) 70% DES mixture and (f) 90% DES mixture (g) 100% DES mixture.

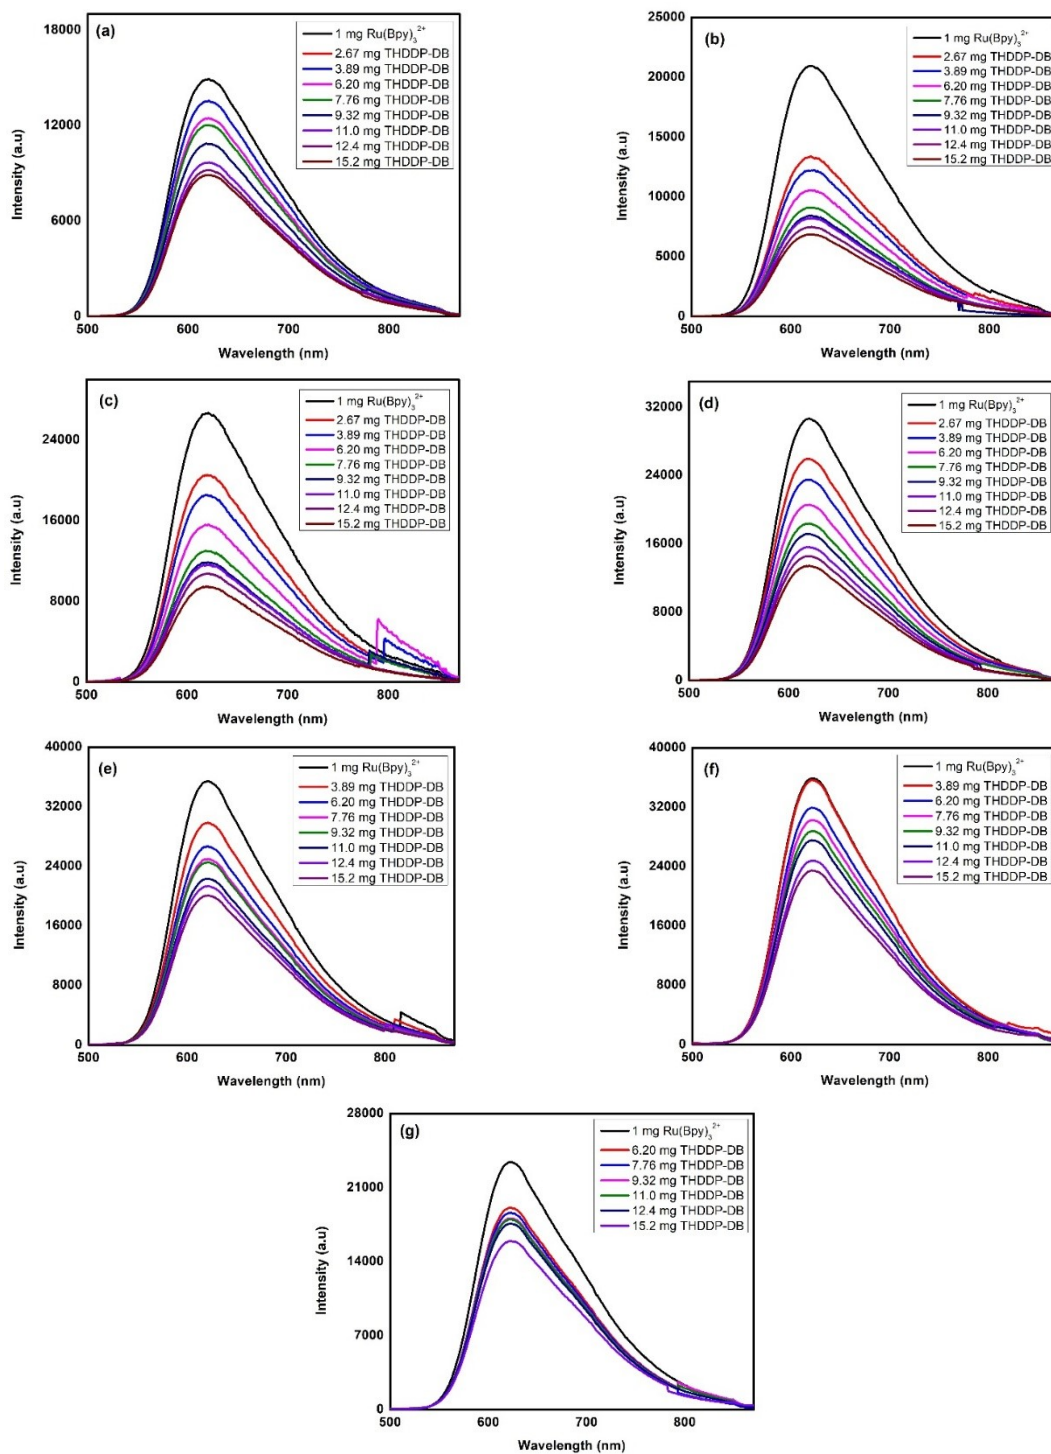

**Fig. S26.** Fluorescence emission spectra ( $\lambda_{\text{excitation}} = 452 \text{ nm}$ ) of 6,7,8,9-tetrahydro-2,13-dimethyldipyrido<1,2-a:2',1'-c><1,4>diazocinedium dibromide (THDDP-DB) in  $[Ru(bpy)_3]^{2+}$  in (a) 0% DES mixture, (b) 10% DES mixture, (c) 30% DES mixture, (d) 50% DES mixture, (e) 70% DES mixture and (f) 90% DES mixture (g) 100% DES mixture.

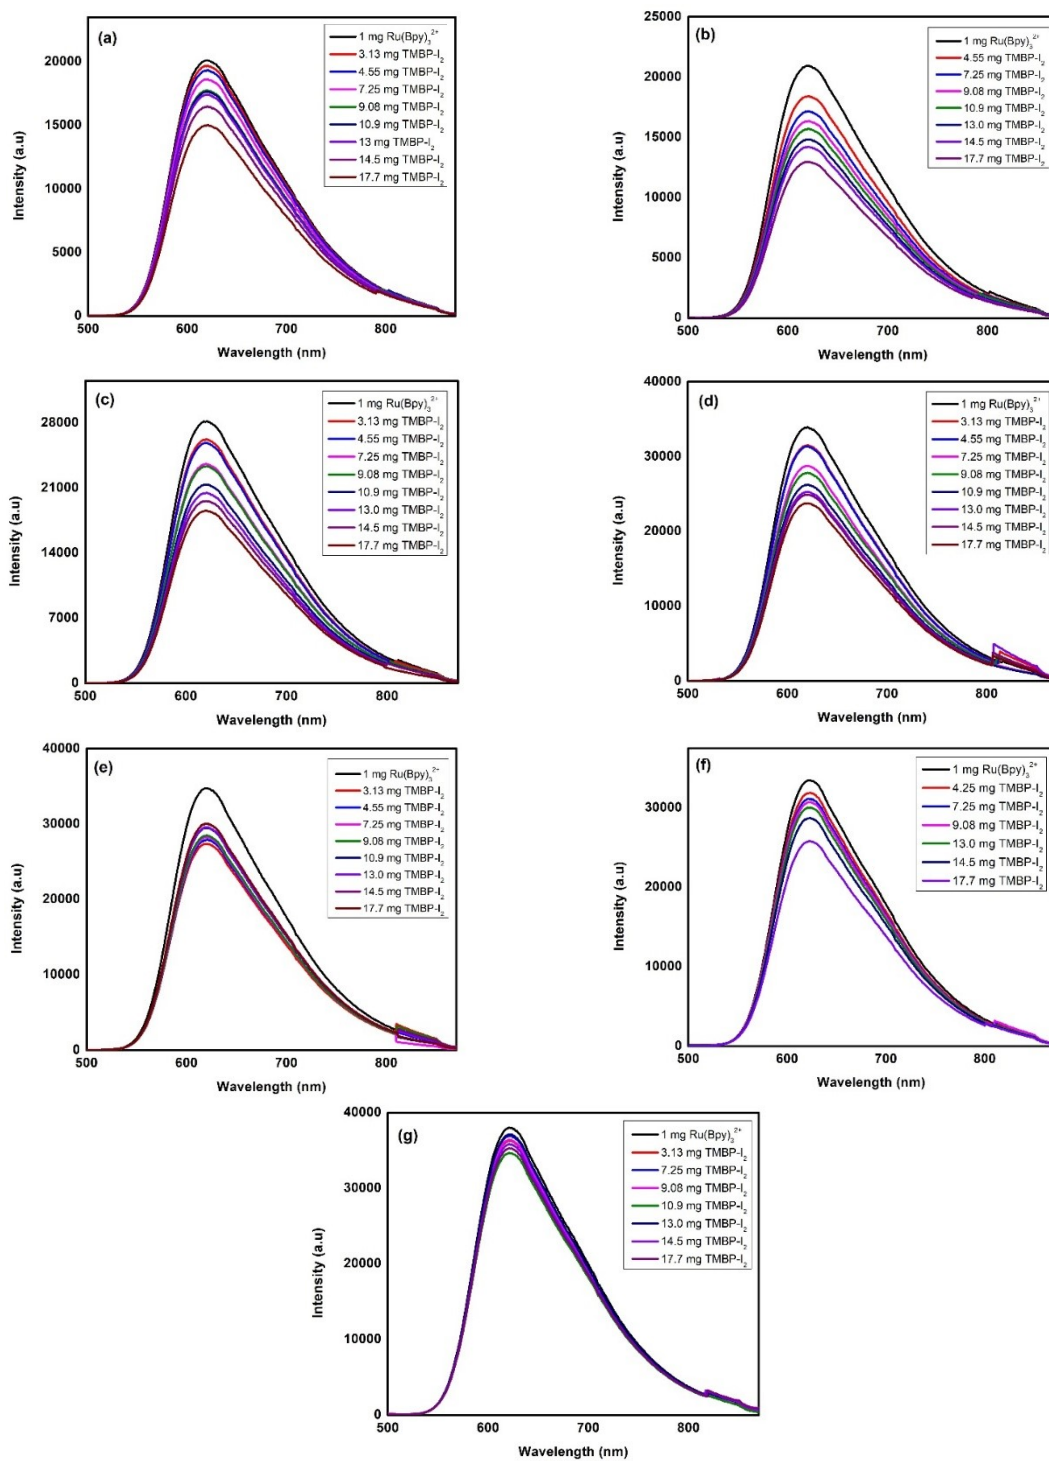

**Fig. S27.** Fluorescence emission spectra ( $\lambda_{\text{excitation}} = 452 \text{ nm}$ ) of 1,1',4,4'-Tetramethyl-2,2'-bipyridinium diiodide (TMBP-I<sub>2</sub>) in [Ru(bpy)<sub>3</sub>]<sup>2+</sup> in (a) 0% DES mixture, (b) 10% DES mixture, (c) 30% DES mixture, (d) 50% DES mixture, (e) 70% DES mixture and (f) 90% DES mixture (g) 100% DES mixture.

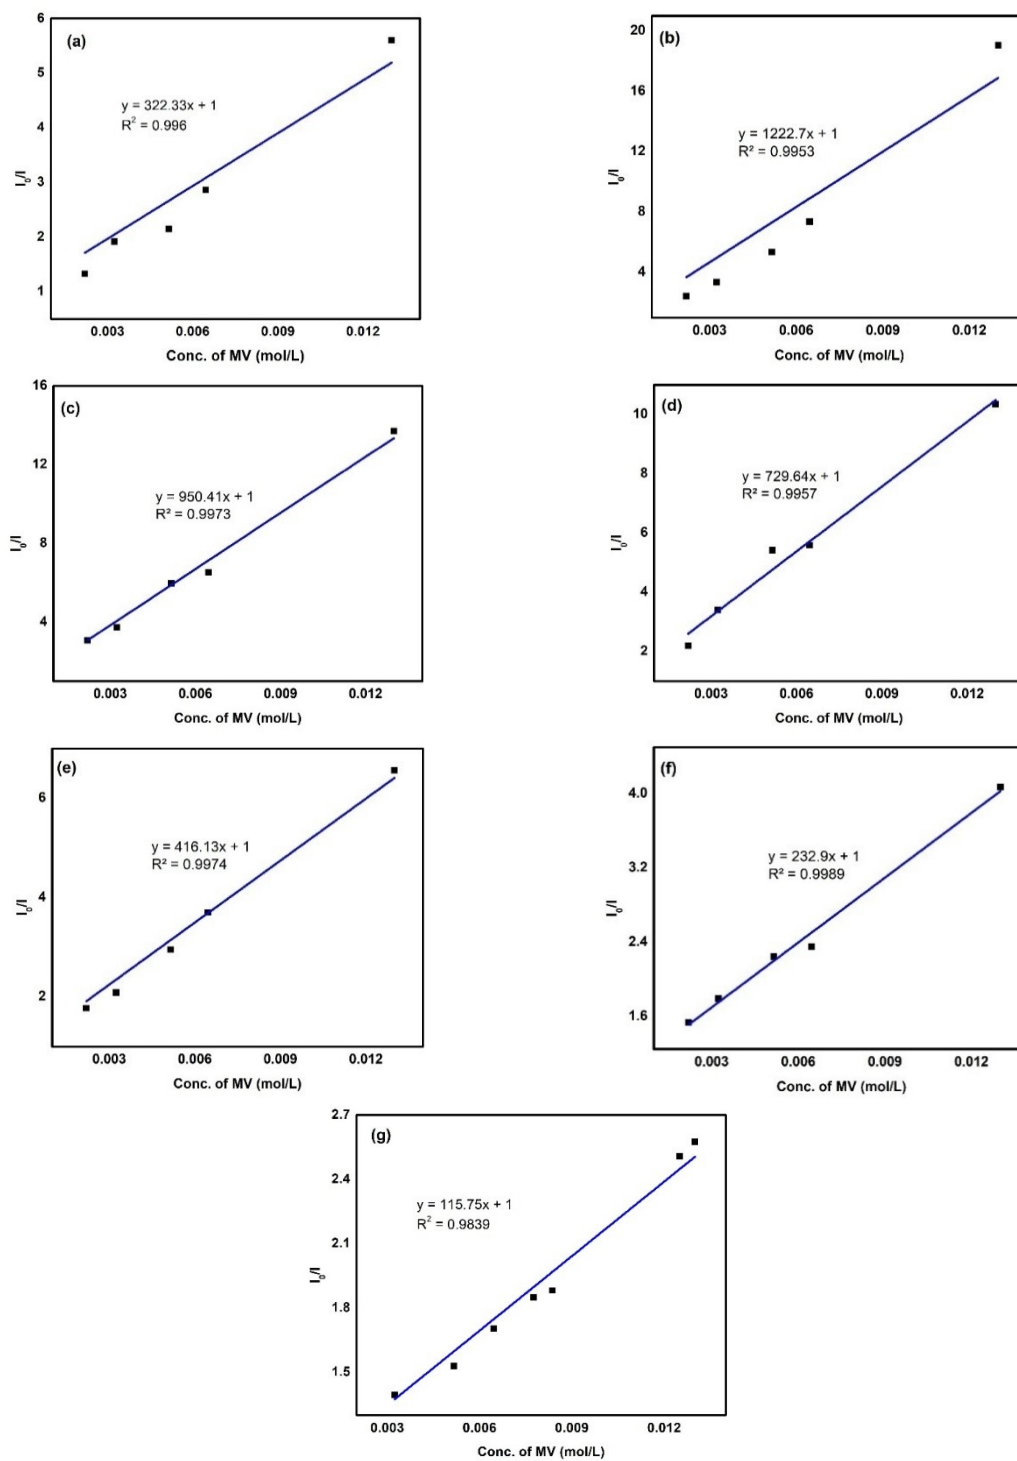

**Fig. S28.** Stern-Volmer plots of methyl viologen dichloride hydrate (MV) in Ru(Bpy)<sub>3</sub><sup>2+</sup> in (a) 0% DES mixture, (b) 10% DES mixture, (c) 30% DES mixture, (d) 50% DES mixture, (e) 70% DES mixture, (f) 90% DES mixture and (g) 100% DES.

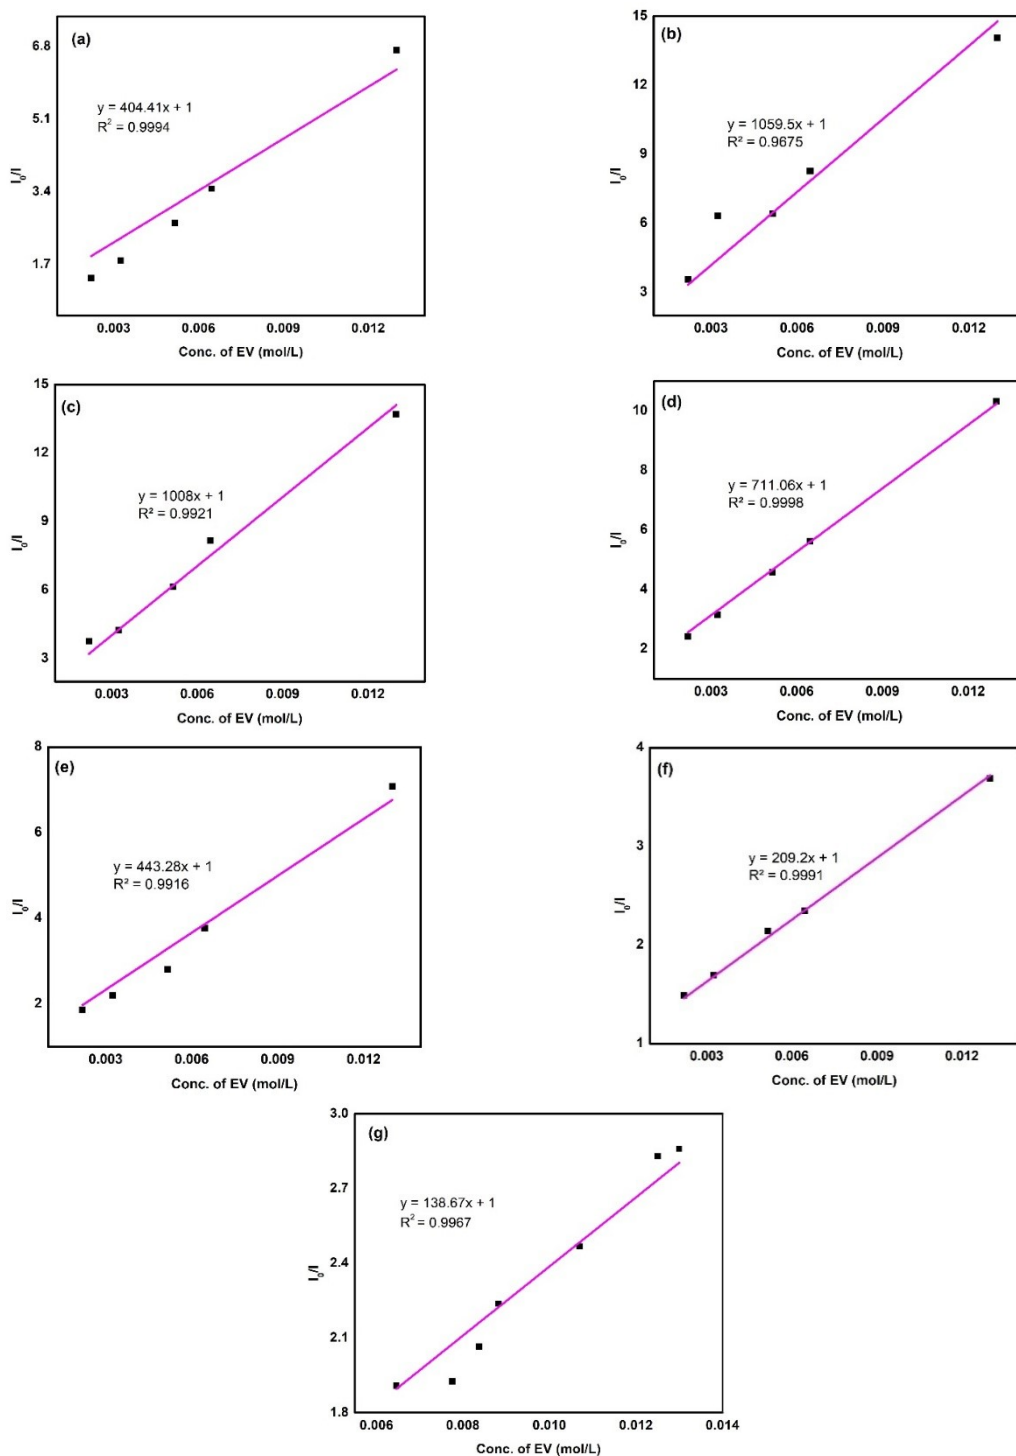

**Fig. S29.** Stern-Volmer plots of ethyl viologen dibromide (EV) in  $[Ru(bpy)_3]^{2+}$  in (a) 0% DES mixture, (b) 10% DES mixture, (c) 30% DES mixture, (d) 50% DES mixture, (e) 70% DES mixture, (f) 90% DES mixture and (g) 100% DES.

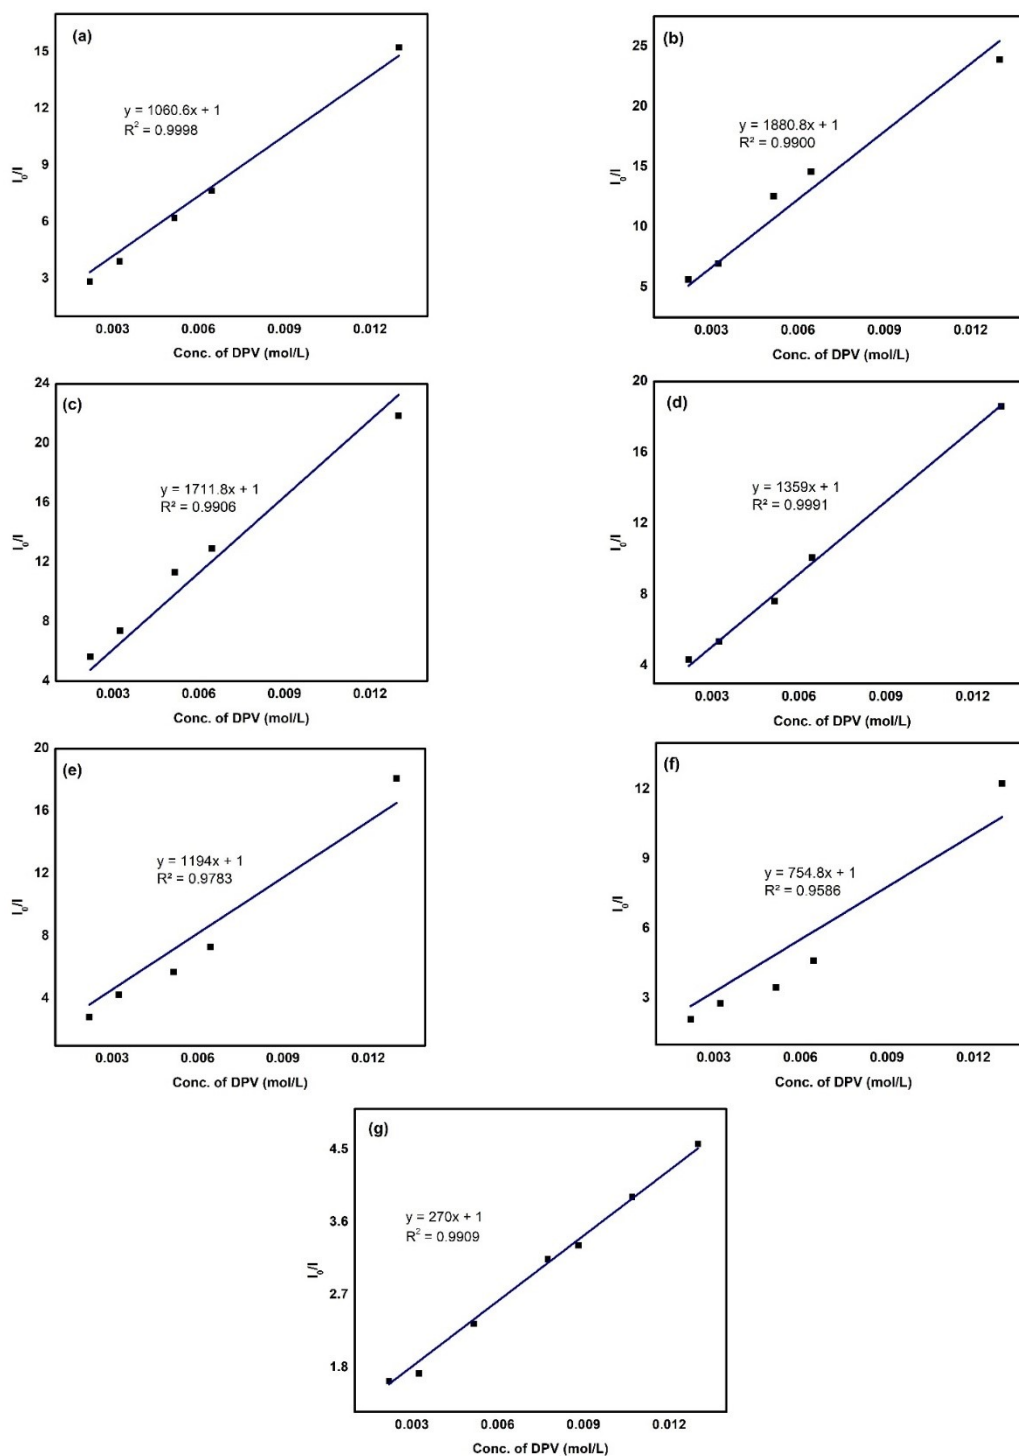

**Fig. S30.** Stern-Volmer plots of 1,1'-Diphenyl-[4,4'-bipyridine]-1,1'-dium chloride (DPV) in  $[Ru(bpy)_3]^{2+}$  in (a) 0% DES mixture, (b) 10% DES mixture, (c) 30% DES mixture, (d) 50% DES mixture, (e) 70% DES mixture, (f) 90% DES mixture and (g) 100% DES.

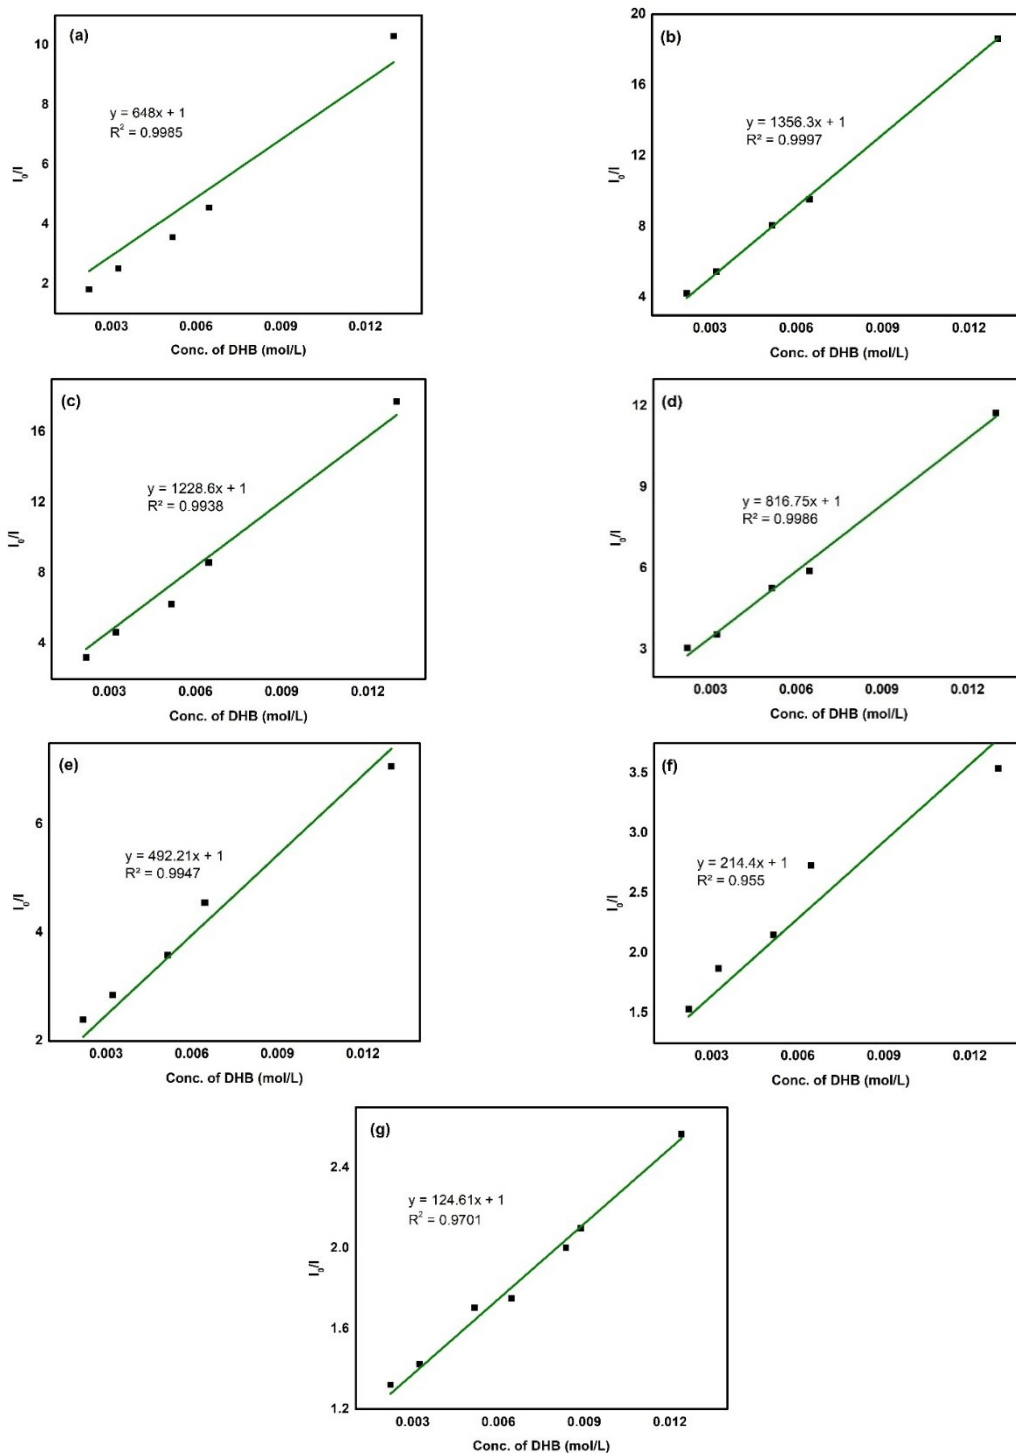

**Fig. S31.** Stern-Volmer plots of 1,1'-Diheptyl-4,4'-bipyridinium Dibromide (DHB) in  $[Ru(bpy)_3]^{2+}$  in (a) 0% DES mixture, (b) 10% DES mixture, (c) 30% DES mixture, (d) 50% DES mixture, (e) 70% DES mixture, (f) 90% DES mixture and (g) 100% DES.

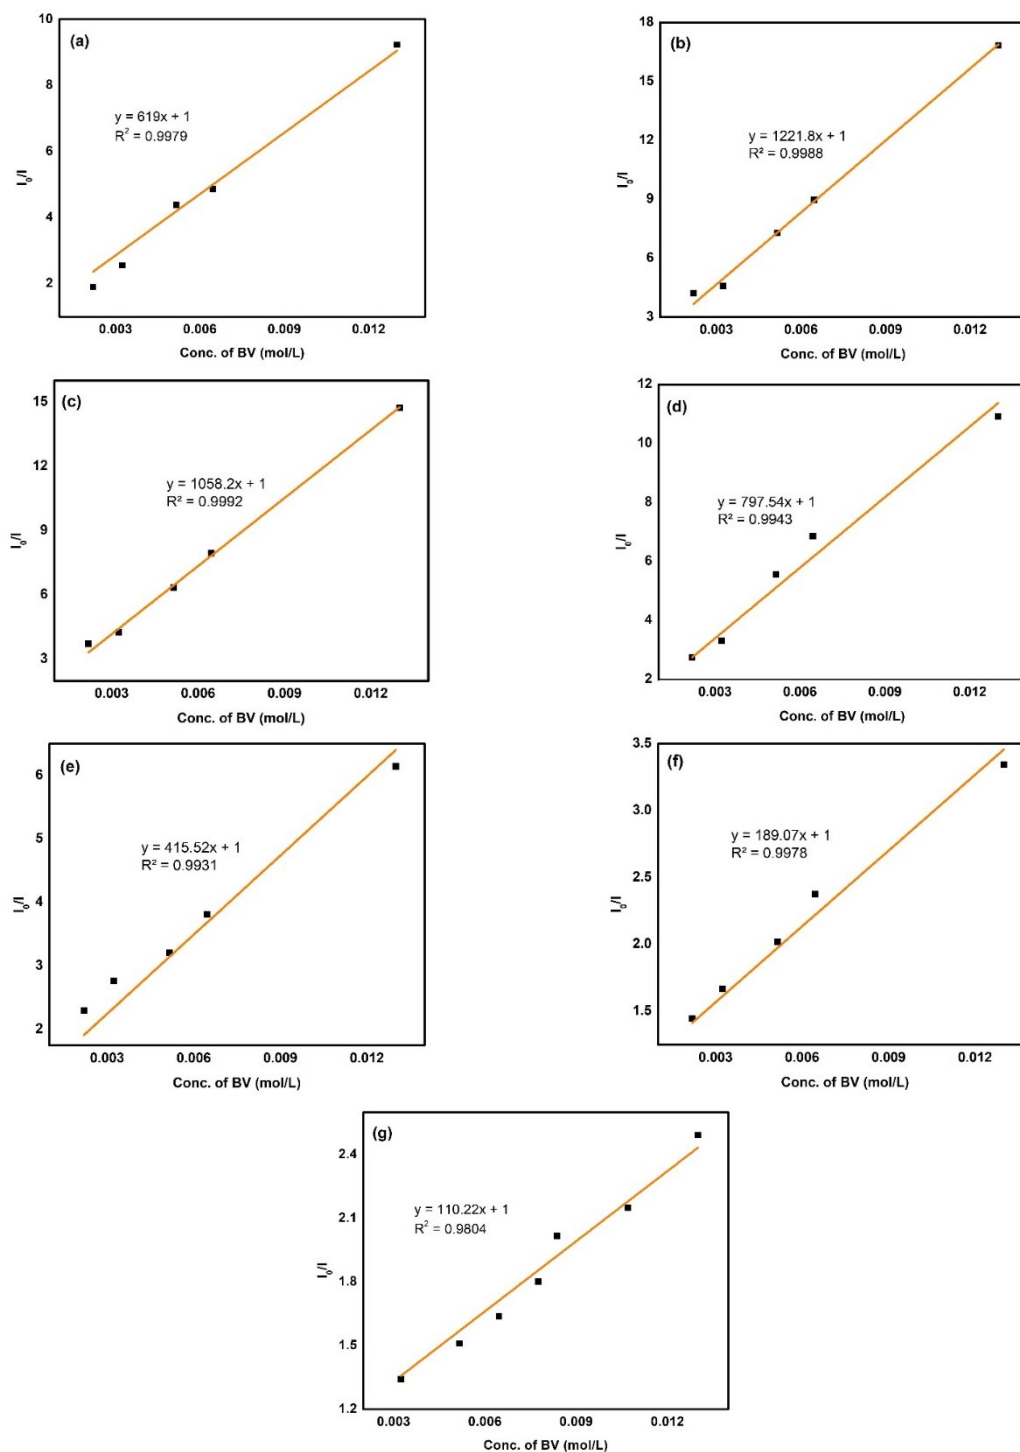

**Fig. S32.** Stern-Volmer plots of benzyl viologen dichloride (BV) in  $[Ru(bpy)_3]^{2+}$  in (a) 0% DES mixture, (b) 10% DES mixture, (c) 30% DES mixture, (d) 50% DES mixture, (e) 70% DES mixture, (f) 90% DES mixture and (g) 100% DES.

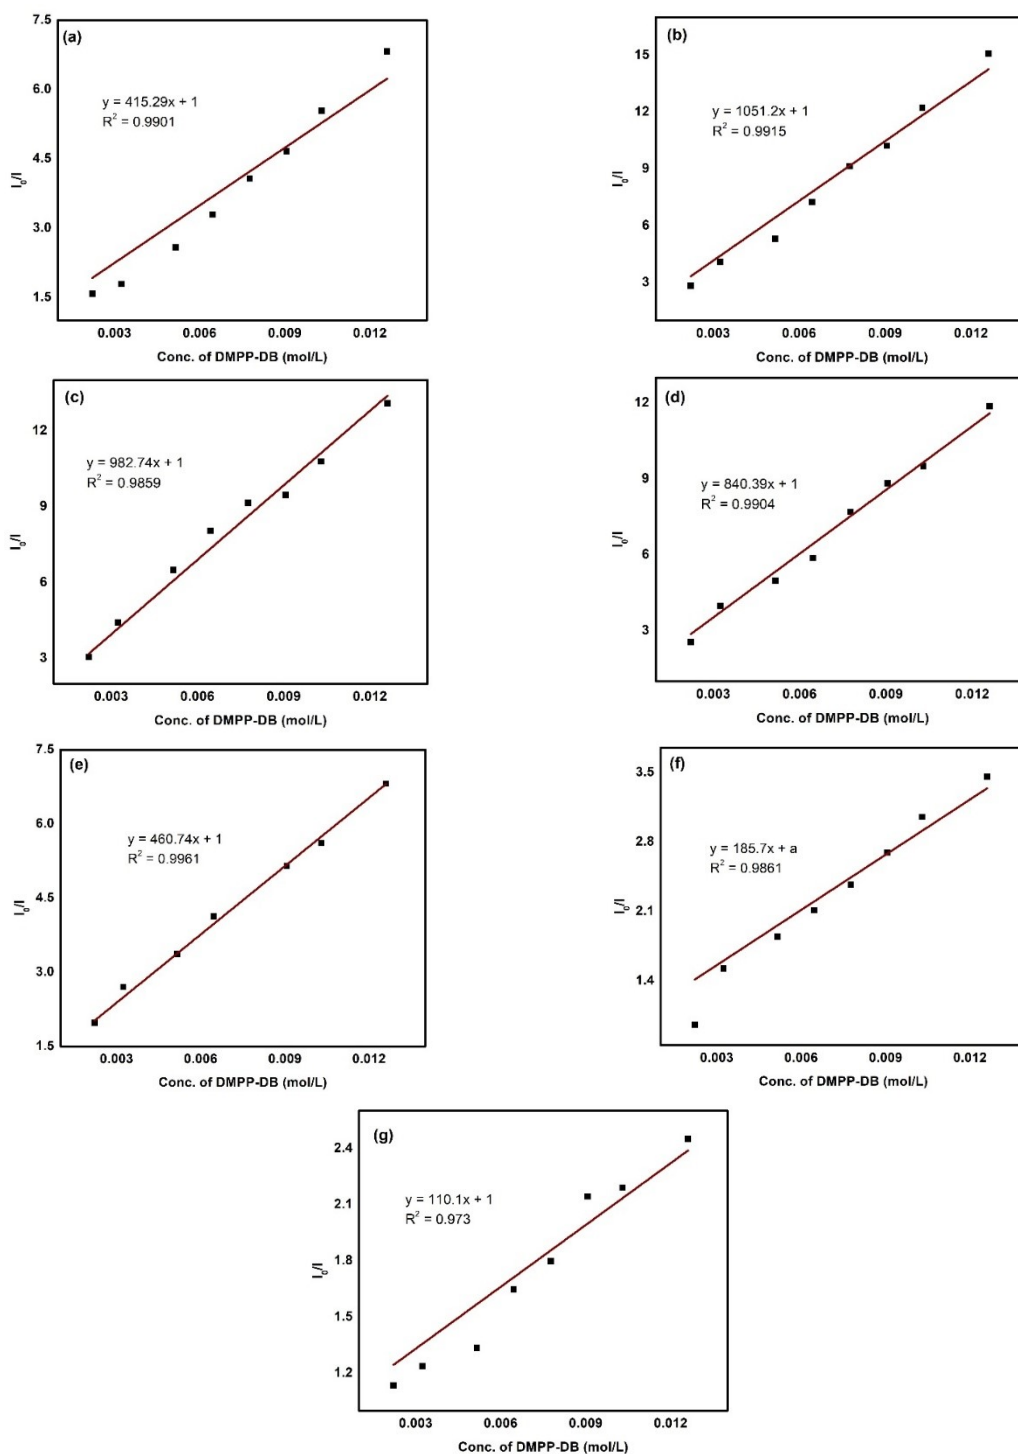

**Fig. S33.** Stern-Volmer plots of 2,11-Dimethyl-6,7-dihydrodipyrido[1,2-a:2',1'-c]pyrazinediium dibromide (DMPP-DB) in  $[Ru(bpy)_3]^{2+}$  in (a) 0% DES mixture, (b) 10% DES mixture, (c) 30% DES mixture, (d) 50% DES mixture, (e) 70% DES mixture, (f) 90% DES mixture and (g) 100% DES.

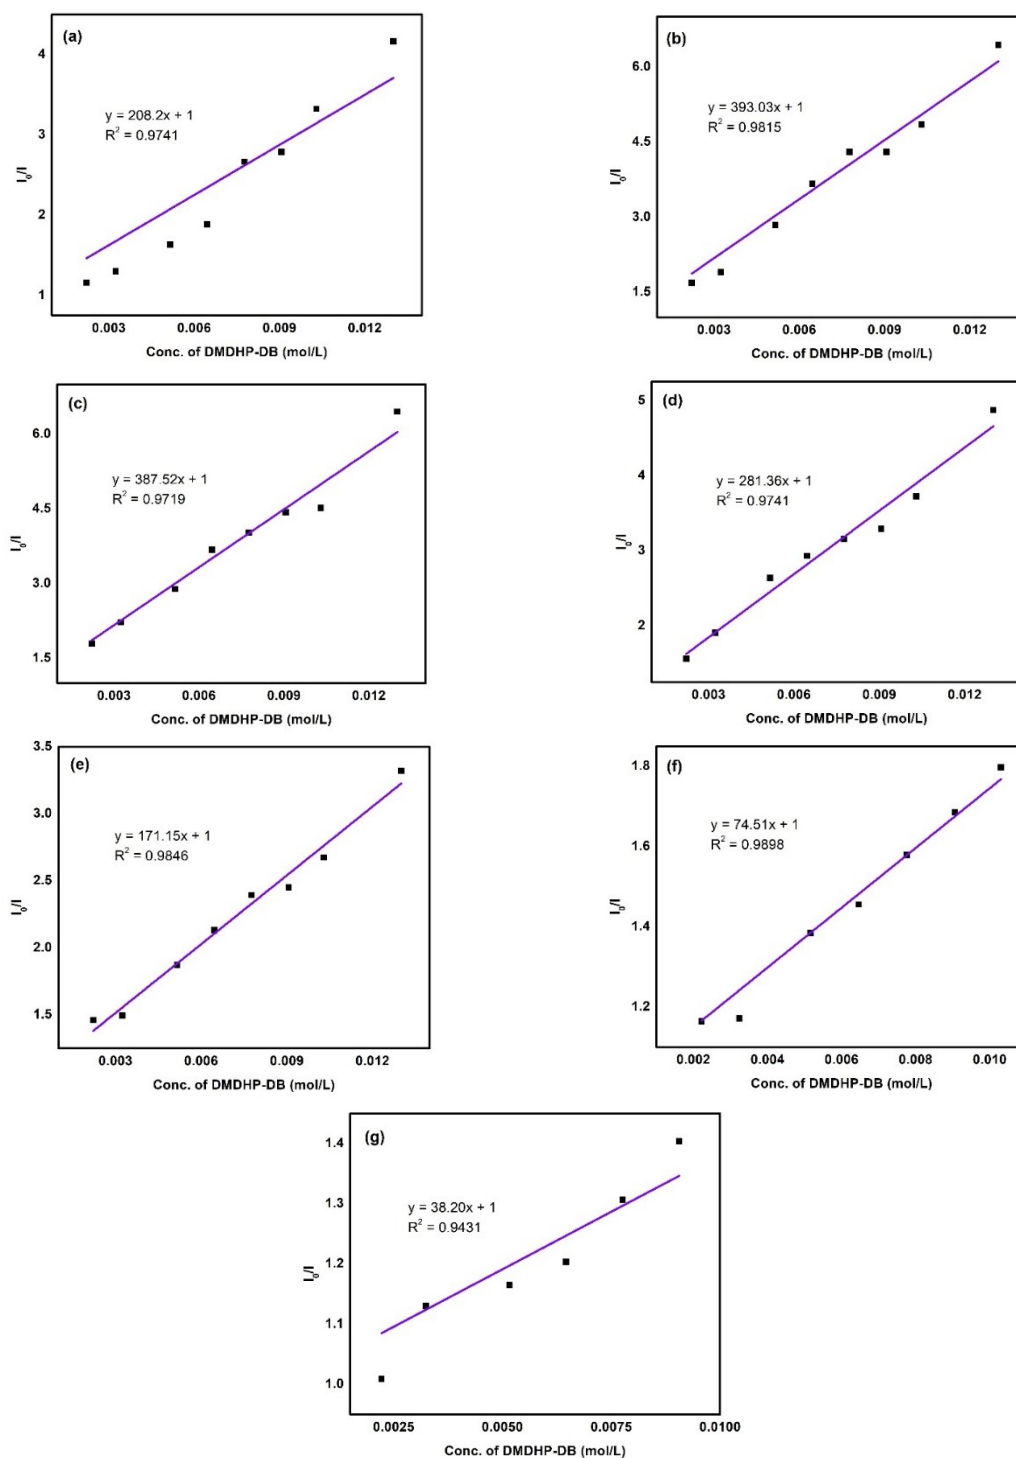

**Fig. S34.** Stern-Volmer plots of 2,12- Dimethyl-7,8-dihydro-6Ff-dipyrido[1,2-a :2',1'-c ]-[1,4]diazepinium Dibromide (DMDHP-DB) in  $[Ru(bpy)_3]^{2+}$  in (a) 0% DES mixture, (b) 10% DES mixture, (c) 30% DES mixture, (d) 50% DES mixture, (e) 70% DES mixture, (f) 90% DES mixture and (g) 100% DES.

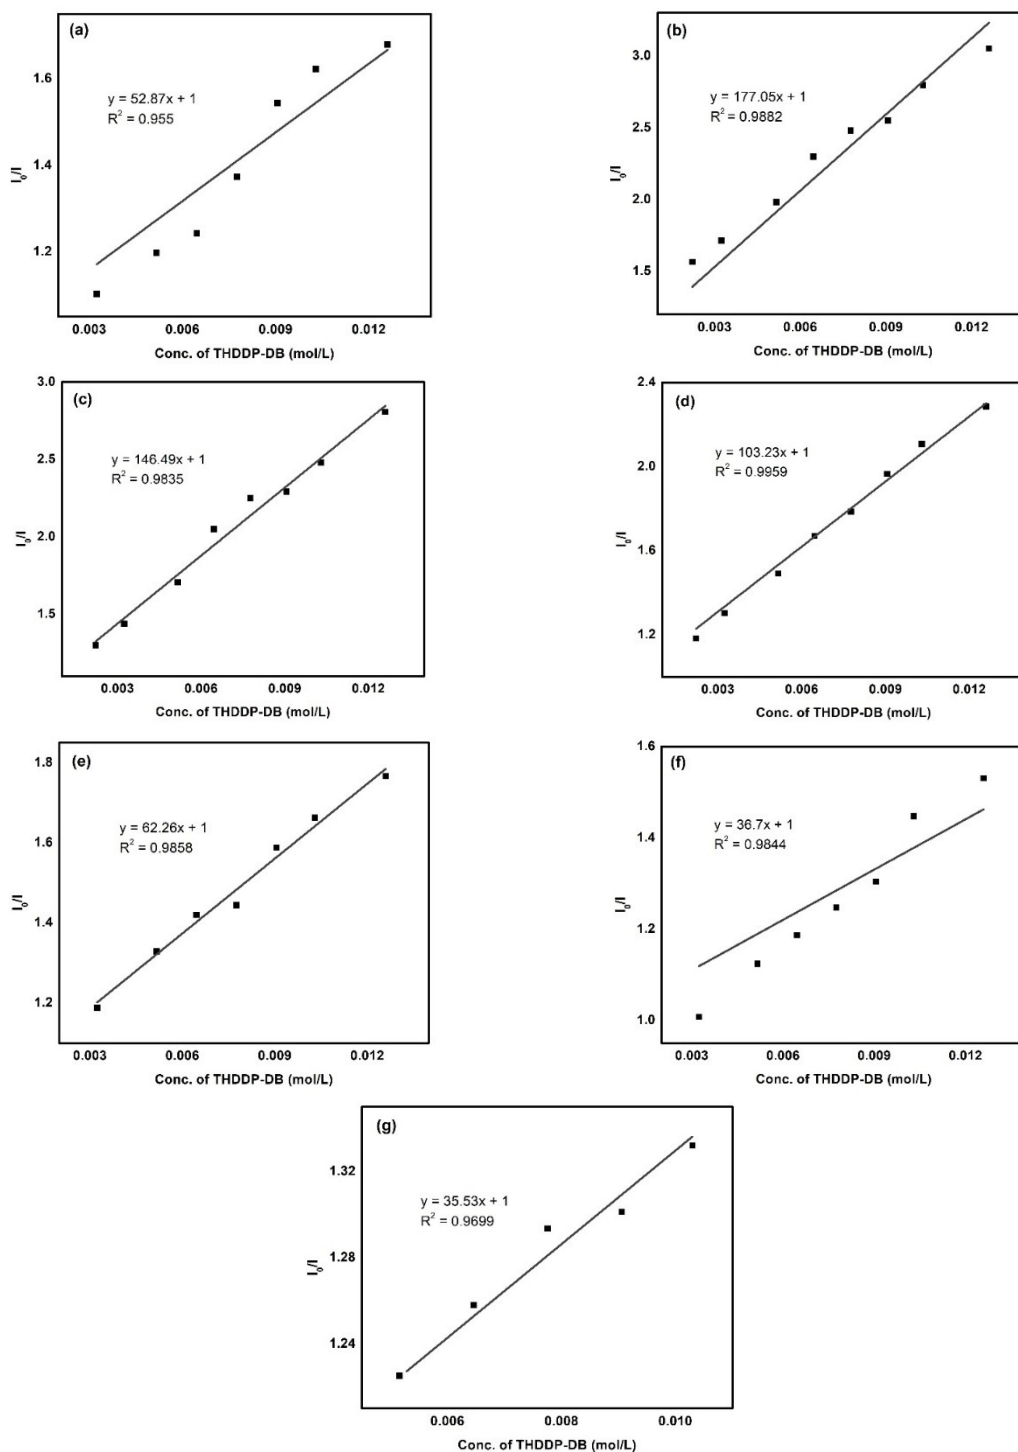

**Fig. S35.** Stern-Volmer plots of 6,7,8,9-tetrahydro-2,13-dimethyldipyrido[1,2-a:2',1'-c][1,4]diazocinediium dibromide (THDDP-DB) in  $[Ru(bpy)_3]^{2+}$  in (a) 0% DES mixture, (b) 10% DES mixture, (c) 30% DES mixture, (d) 50% DES mixture, (e) 70% DES mixture, (f) 90% DES mixture and (g) 100% DES.

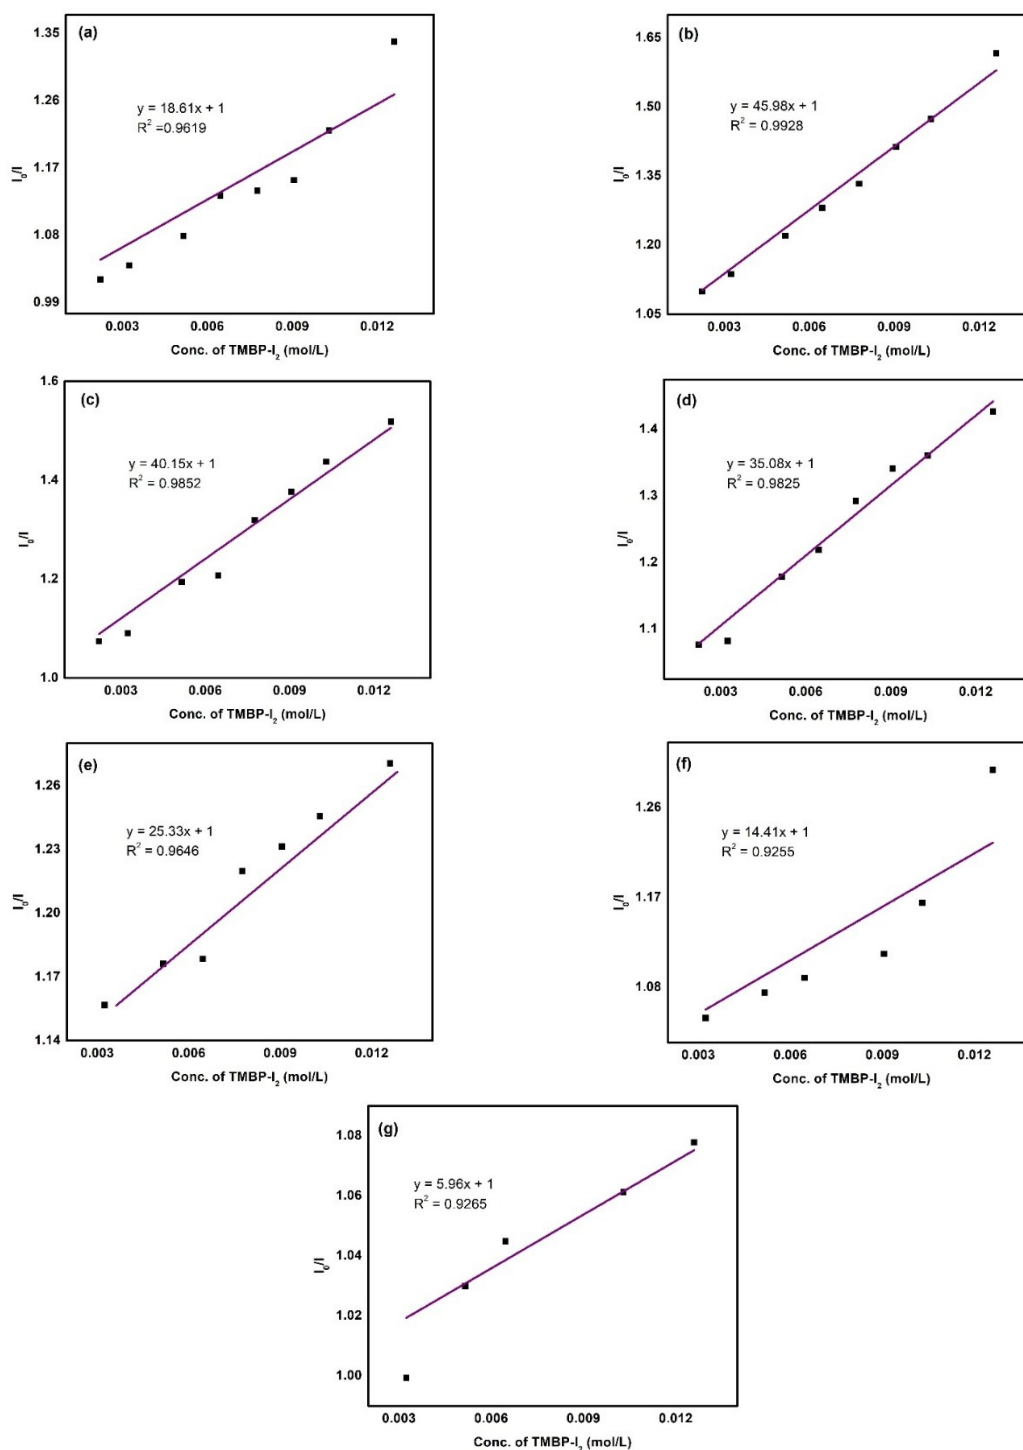

**Fig. S36.** Stern-Volmer plots of 1,1',4,4'-Tetramethyl-2,2'-bipyridinium diiodide (TMBP-I<sub>2</sub>) in [Ru(bpy)<sub>3</sub>]<sup>2+</sup> in (a) 0% DES mixture, (b) 10% DES mixture, (c) 30% DES mixture, (d) 50% DES mixture, (e) 70% DES mixture, (f) 90% DES mixture and (g) 100% DES.

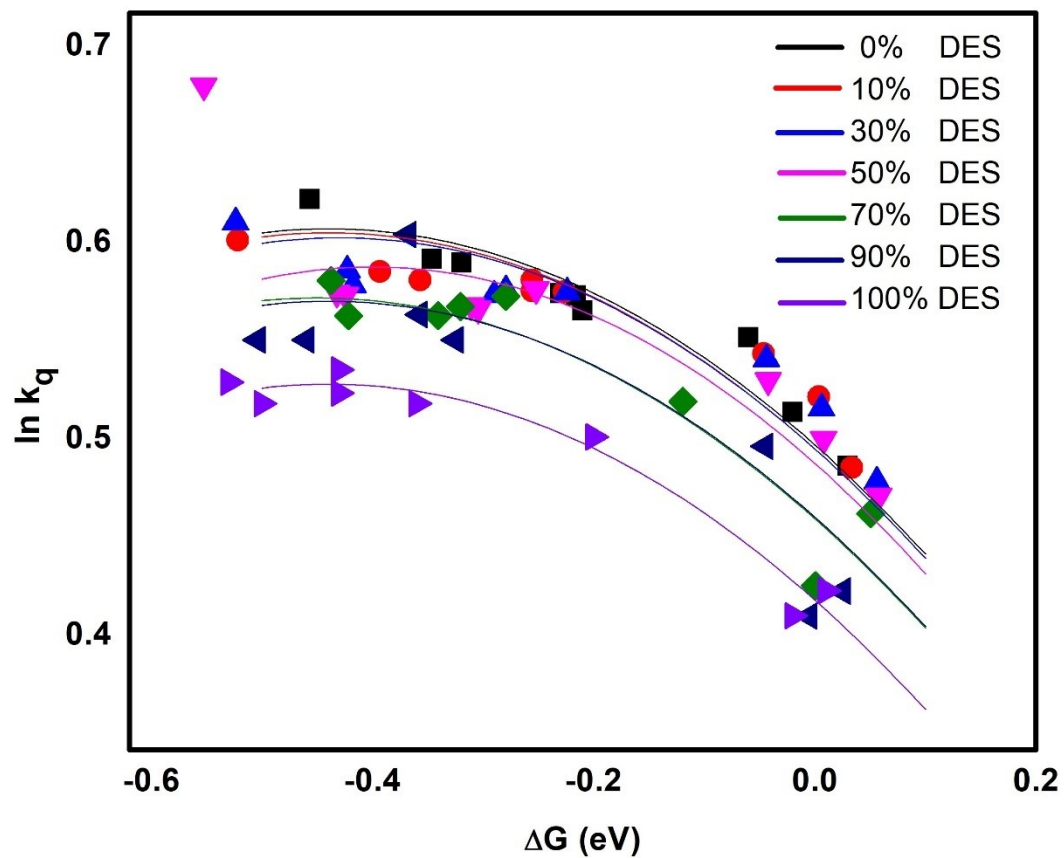

Figure S37: Electron transfer data plotted using Marcus analysis.

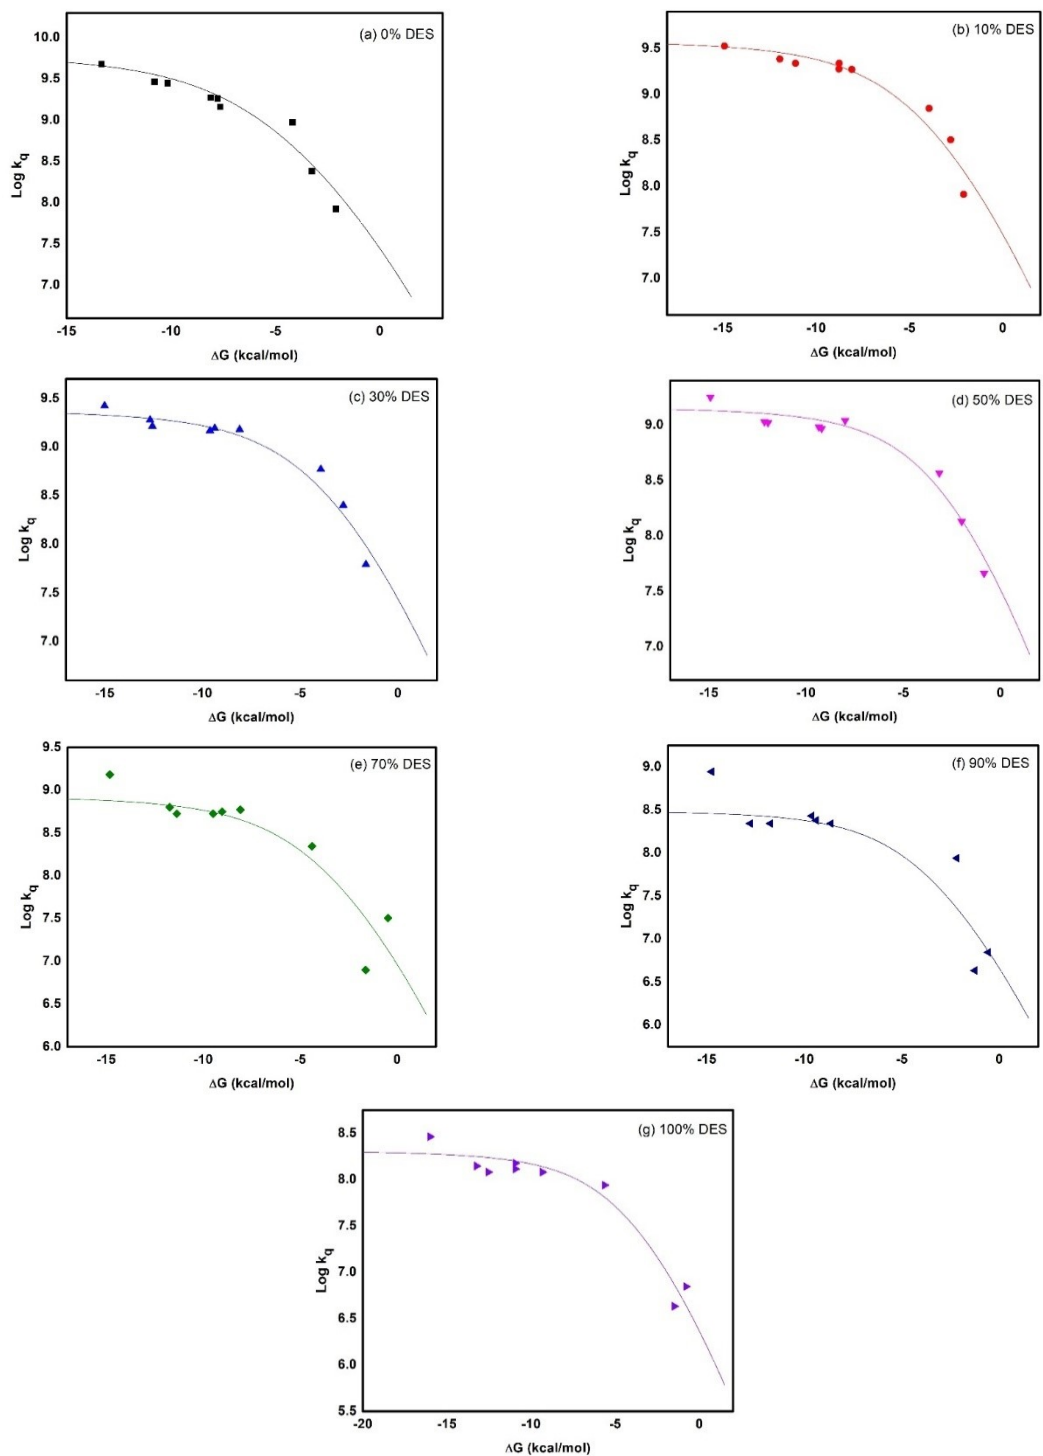

**Fig. S38.** Rehm-Weller plots of electron transfer data in (a) 0% DES mixture, (b) 10% DES mixture, (c) 30% DES mixture, (d) 50% DES mixture, (e) 70% DES mixture, (f) 90% DES mixture and (g) 100% DES.

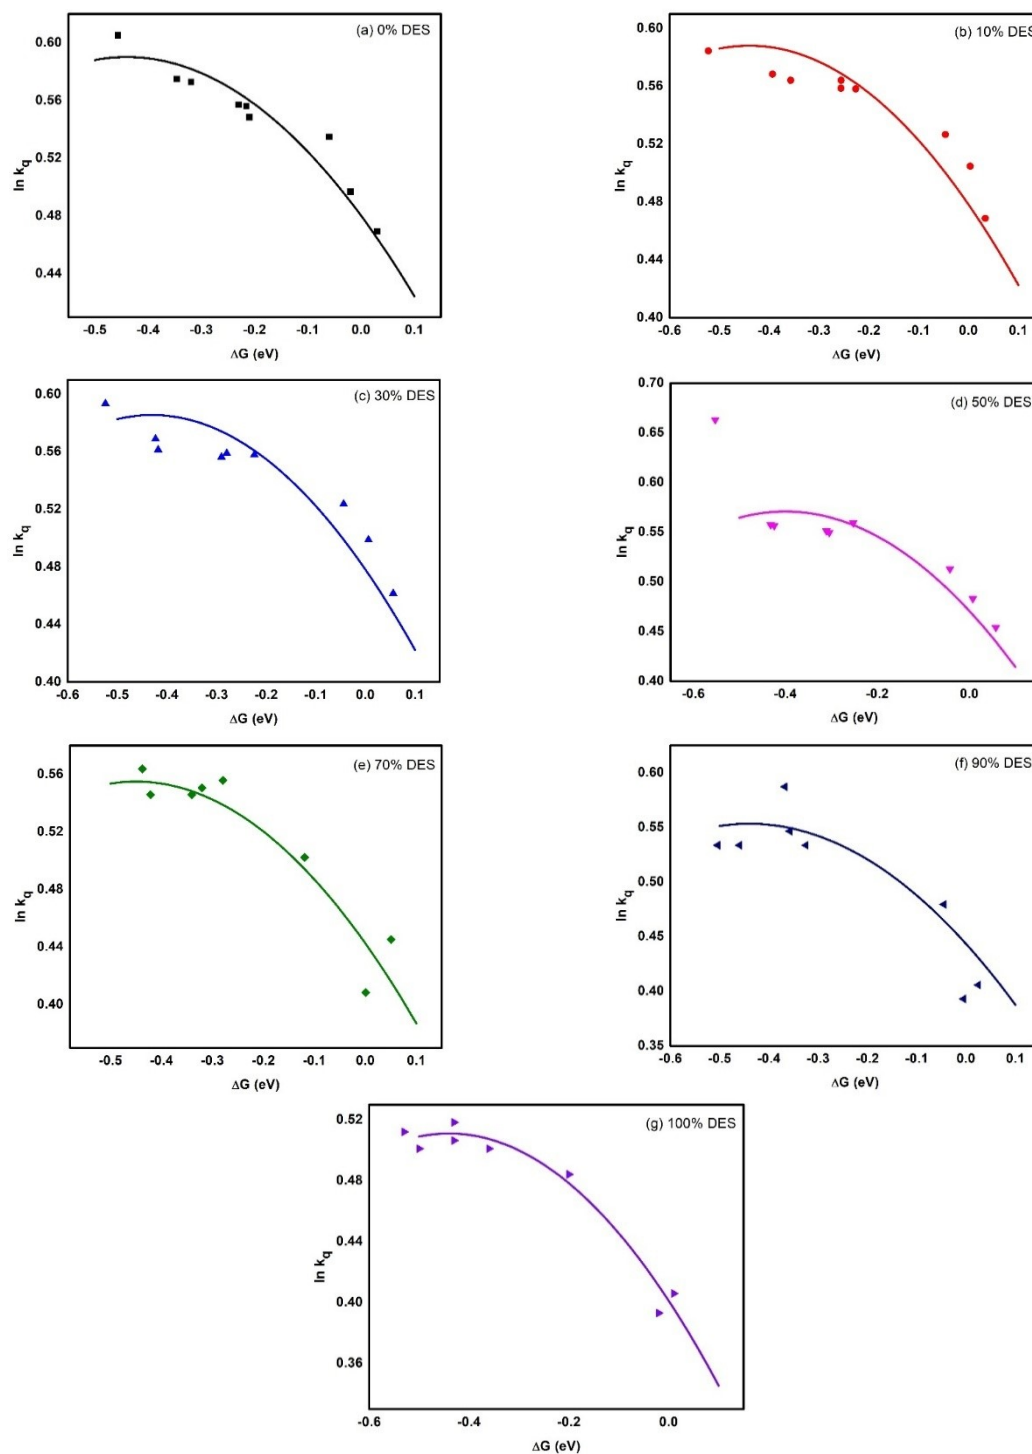

**Fig. S39.** Marcus theory plots of electron transfer data in (a) 0% DES mixture, (b) 10% DES mixture, (c) 30% DES mixture, (d) 50% DES mixture, (e) 70% DES mixture, (f) 90% DES mixture and (g) 100% DES.

## References

- (1) Marcus, R. A. Electron Transfer Reactions in Chemistry. Theory and Experiment. *Pure Appl. Chem.* **1997**, *69* (1), 13–29. <https://doi.org/10.1351/pac199769010013>.
